# Supplementary material for: New dihydropyrimidin-2(1H)-one based Hsp90 C-terminal inhibitors
Source: Royal Society of Chemistry journal article supplement (doi:10.1039/c6ra17235k), 2016-01-01
Supplement: c6ra17235k1.pdf [file c6ra17235k1.pdf]

## Supporting information for

### New dihydropyrimidin-2(1*H*)-one based Hsp90 C-terminal inhibitors

S. Terracciano,<sup>†a</sup> A. Foglia,<sup>†a</sup> M. G. Chini,<sup>a</sup> M. C. Vaccaro,<sup>a</sup> A. Russo,<sup>a</sup> F. Dal Piaz,<sup>a,b</sup> C. Saturnino,<sup>a</sup>

R. Riccio,<sup>a</sup> G. Bifulco<sup>\*a</sup> and I. Bruno<sup>\*a</sup>

<sup>a</sup> Department of Pharmacy, University of Salerno, via Giovanni Paolo II, 132, 84084, Fisciano, Italy. Fax: +39 089 969602; Tel: +39 089 969741; Tel: +39 089 969743 E-mail: [bifulco@unisa.it](mailto:bifulco@unisa.it);

[brunoin@unisa.it](mailto:brunoin@unisa.it)

<sup>b</sup> Department of Medicine and Surgery of Salerno, Via Allende, 84081 Baronissi (SA), Italy

#### Table of Contents

|                                                |    |
|------------------------------------------------|----|
| <sup>1</sup> H NMR spectra of compounds 2 - 13 | 2  |
| HSQC NMR spectrum of compounds 2 - 13          | 14 |
| HMBC NMR spectrum of compound 2 - 13           | 26 |

<sup>†</sup> These authors contributed equally to this work.

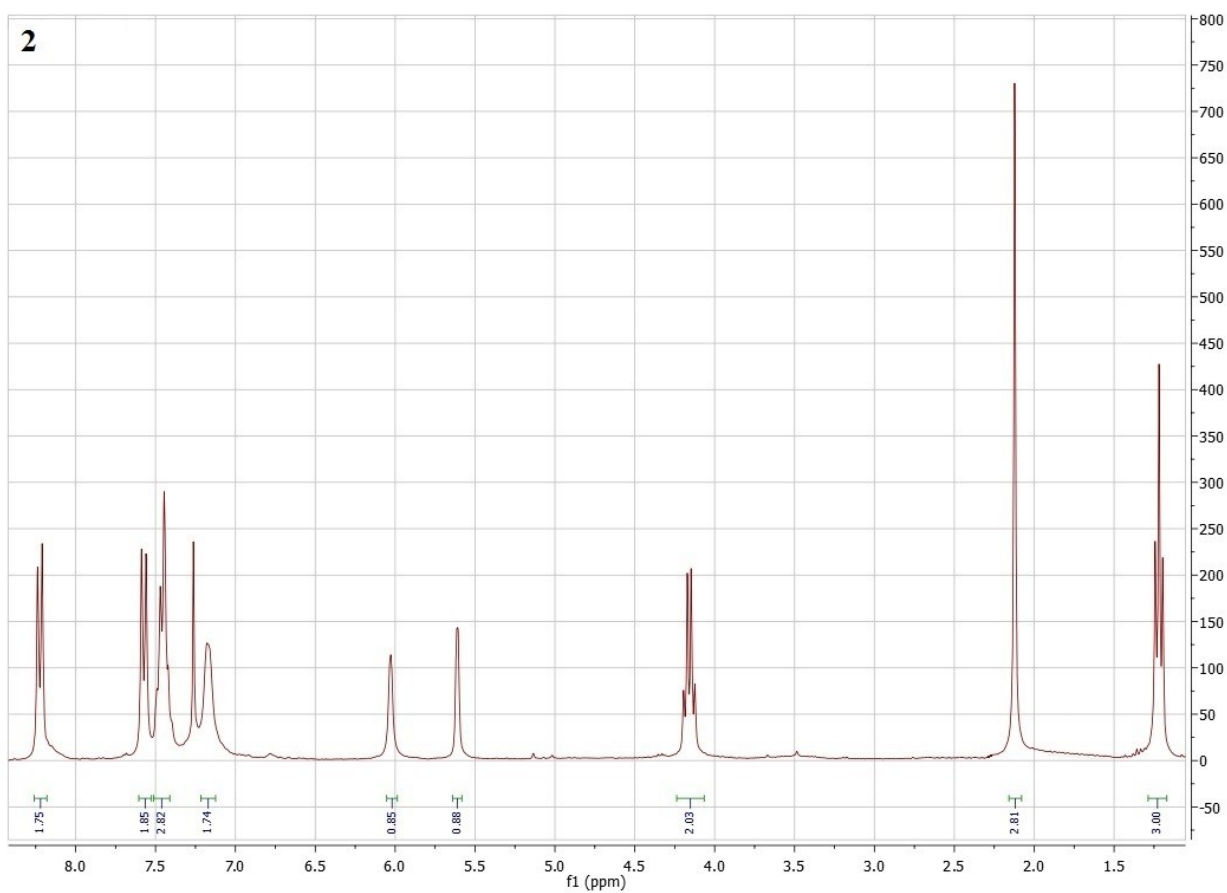

$^1\text{H}$  NMR spectrum of compound **2**

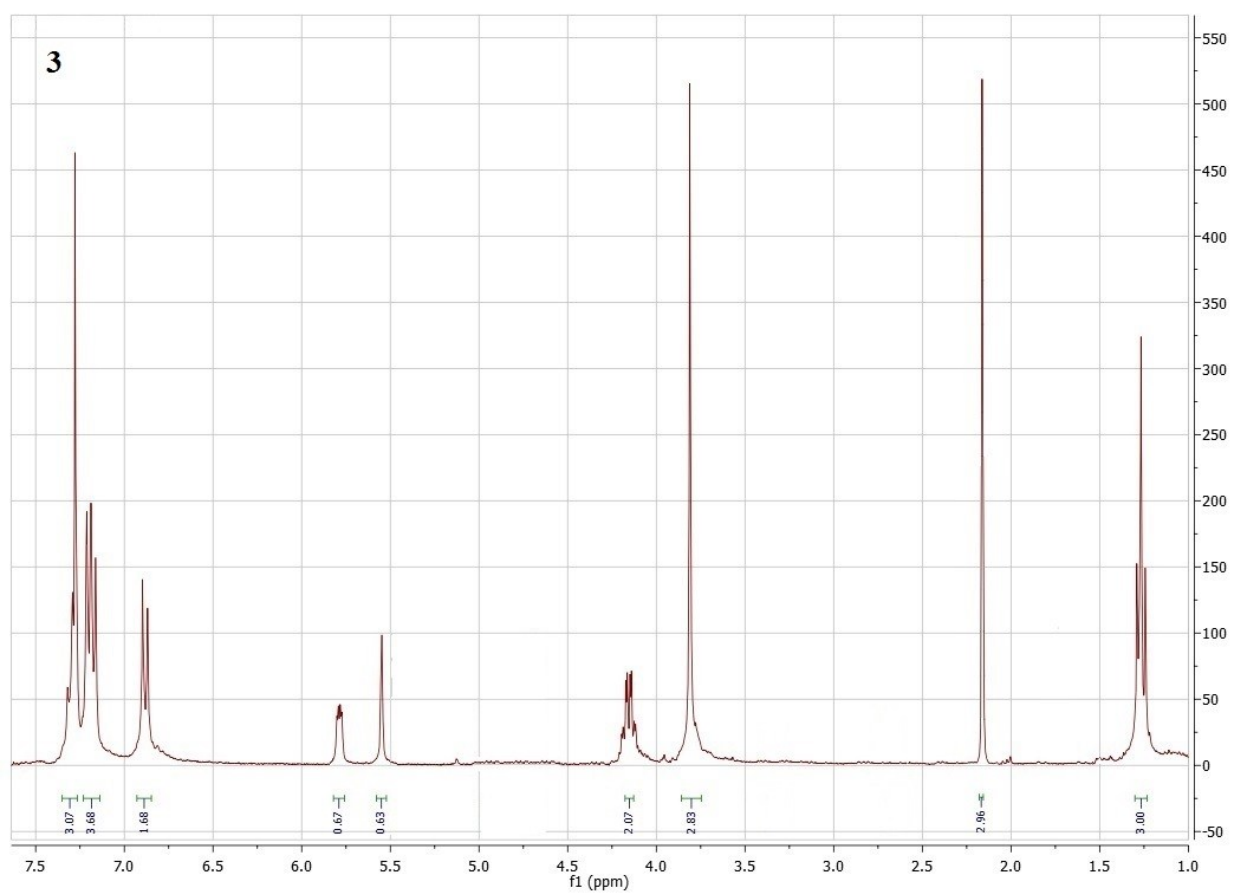

$^1\text{H}$  NMR spectrum of compound **3**

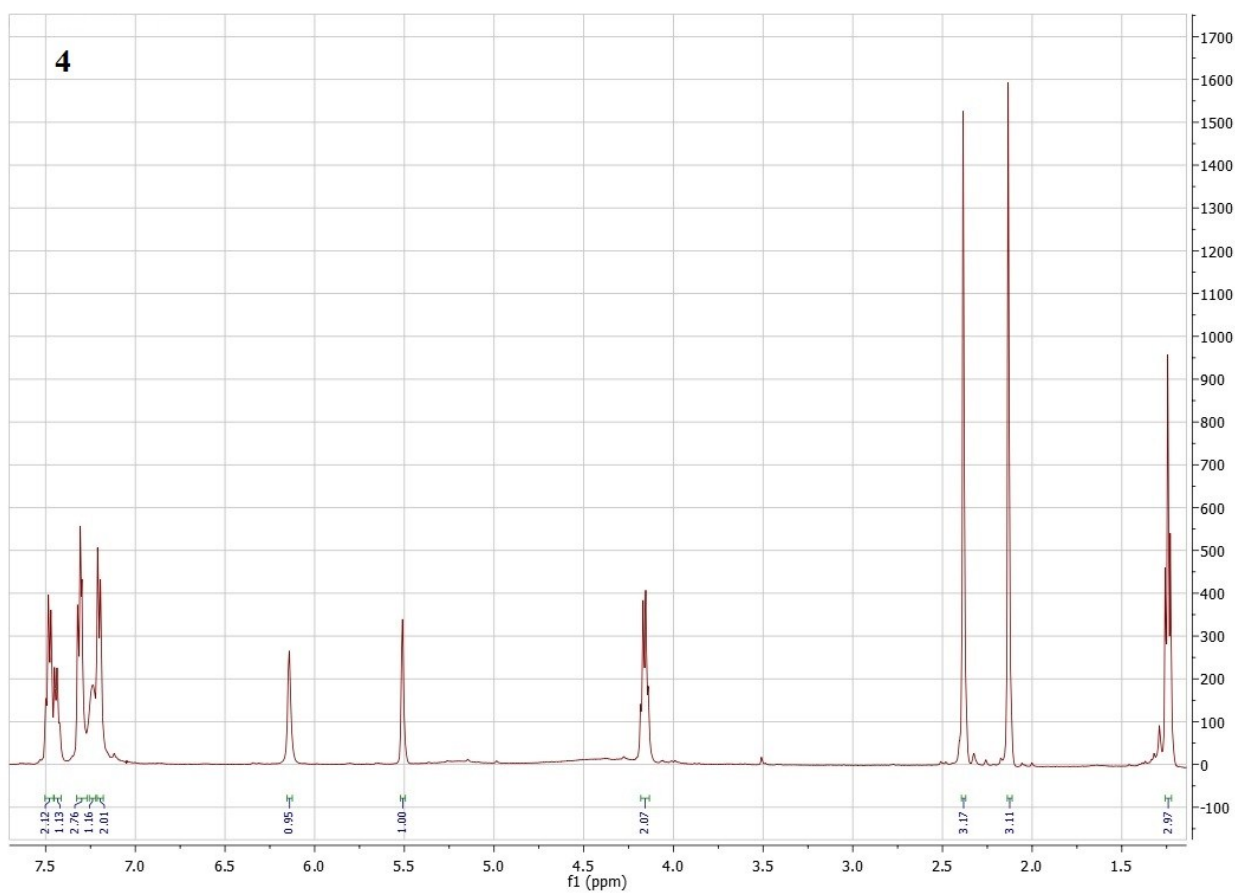

$^1\text{H}$  NMR spectrum of compound **4**

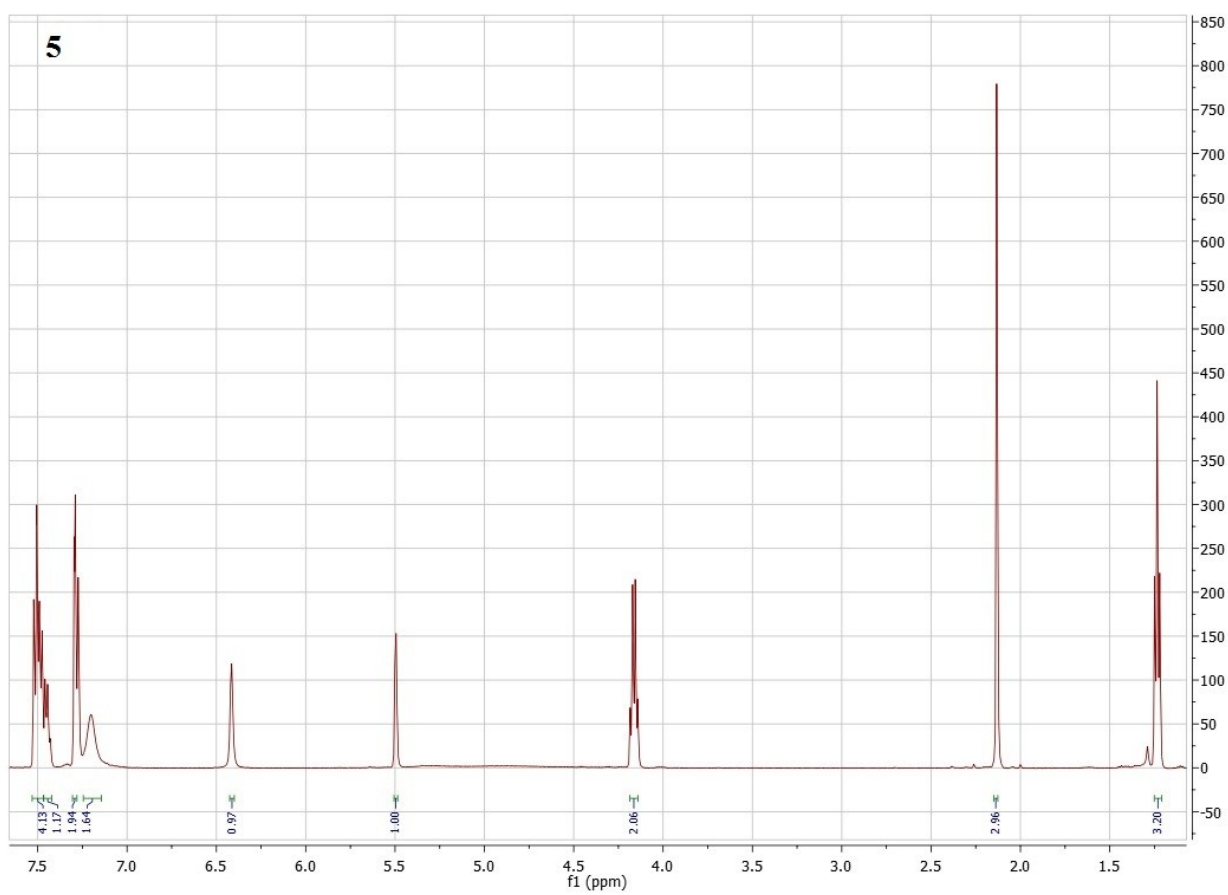

$^1\text{H}$  NMR spectrum of compound **5**

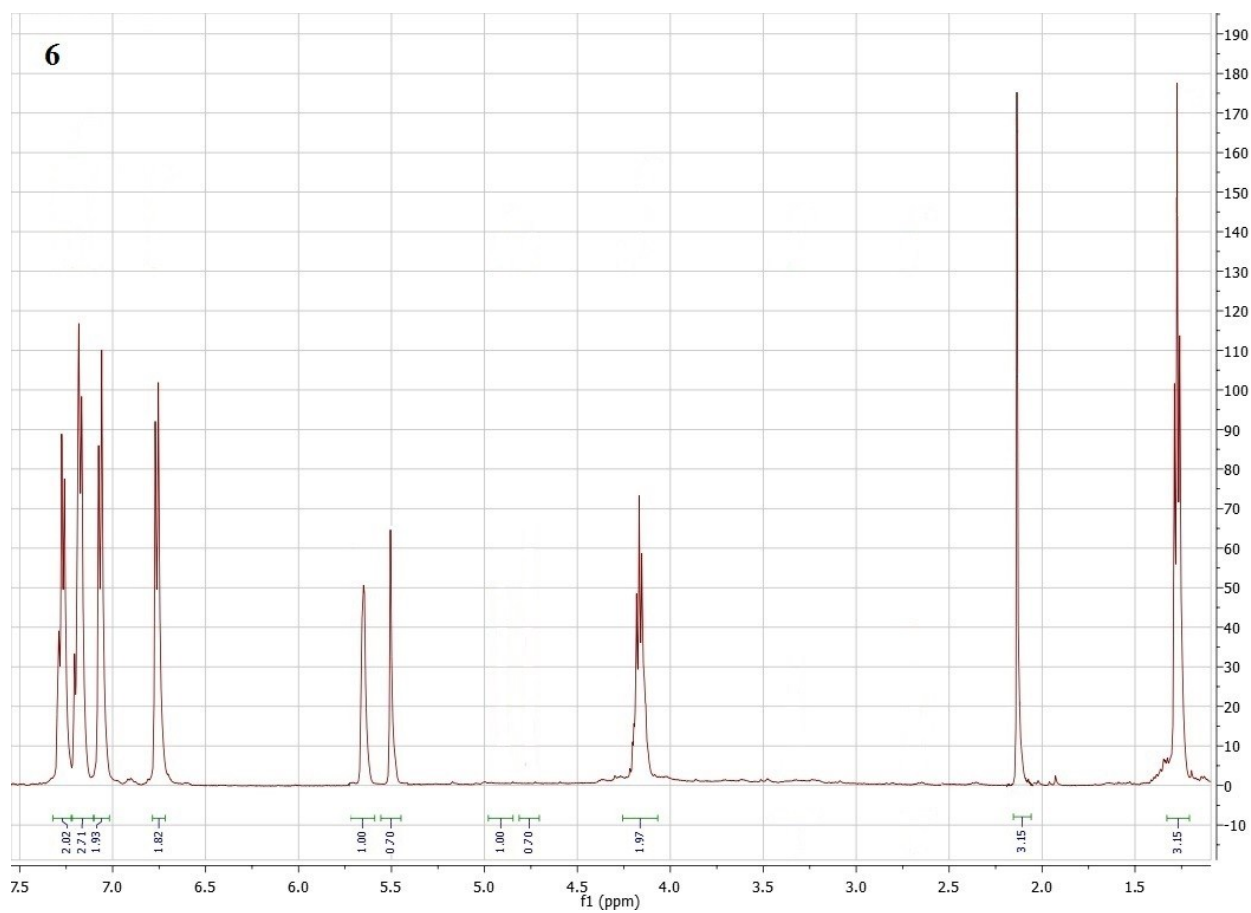

$^1\text{H}$  NMR spectrum of compound **6**

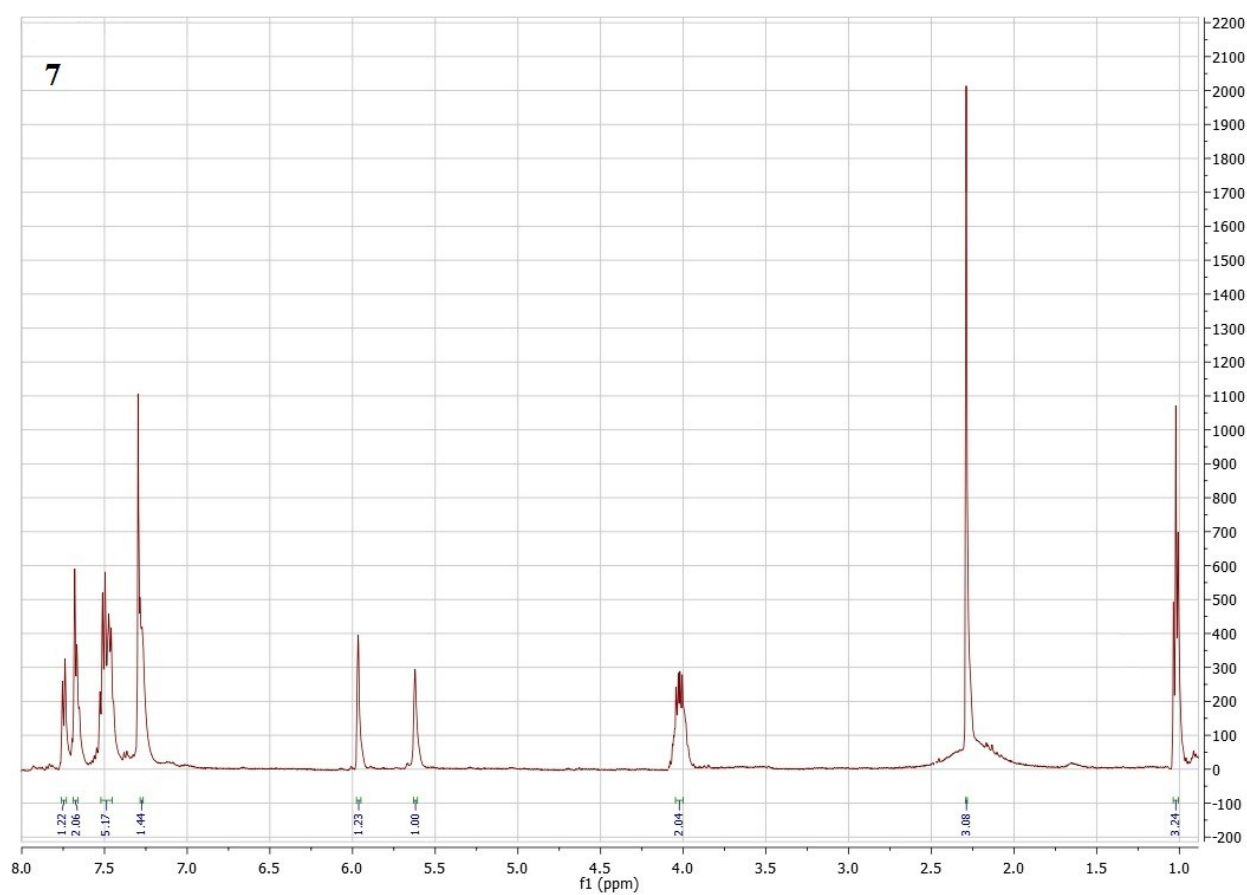

$^1\text{H}$  NMR spectrum of compound 7

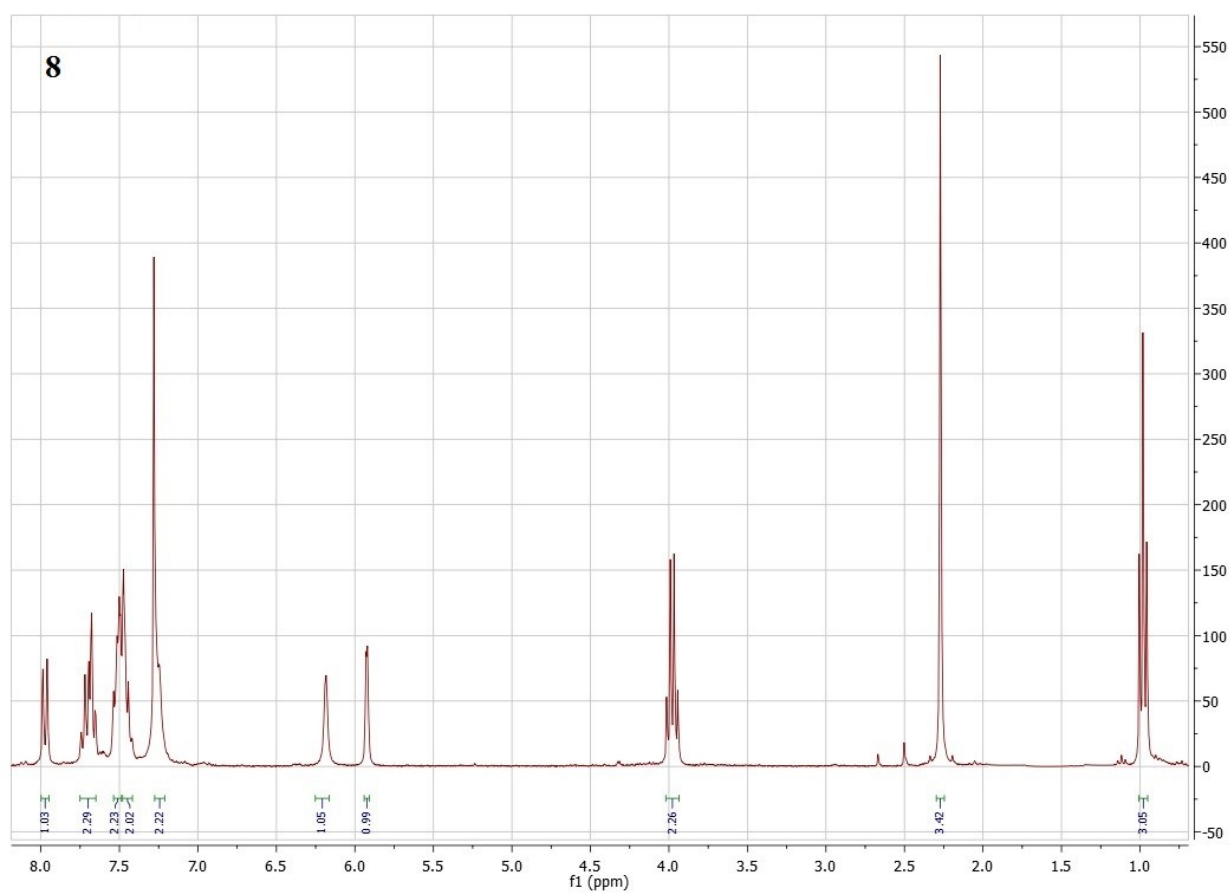

$^1\text{H}$  NMR spectrum of compound **8**



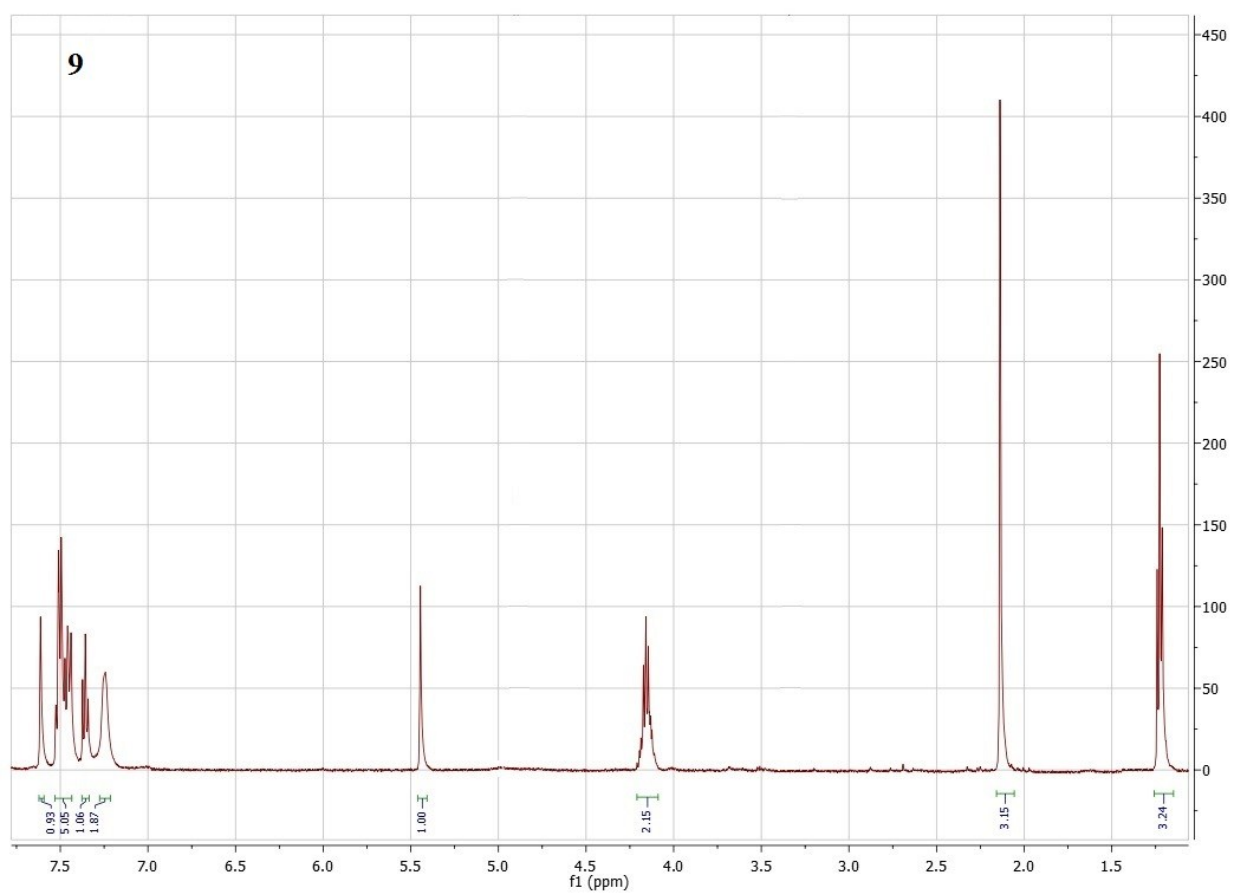

$^1\text{H}$  NMR spectrum of compound **9**

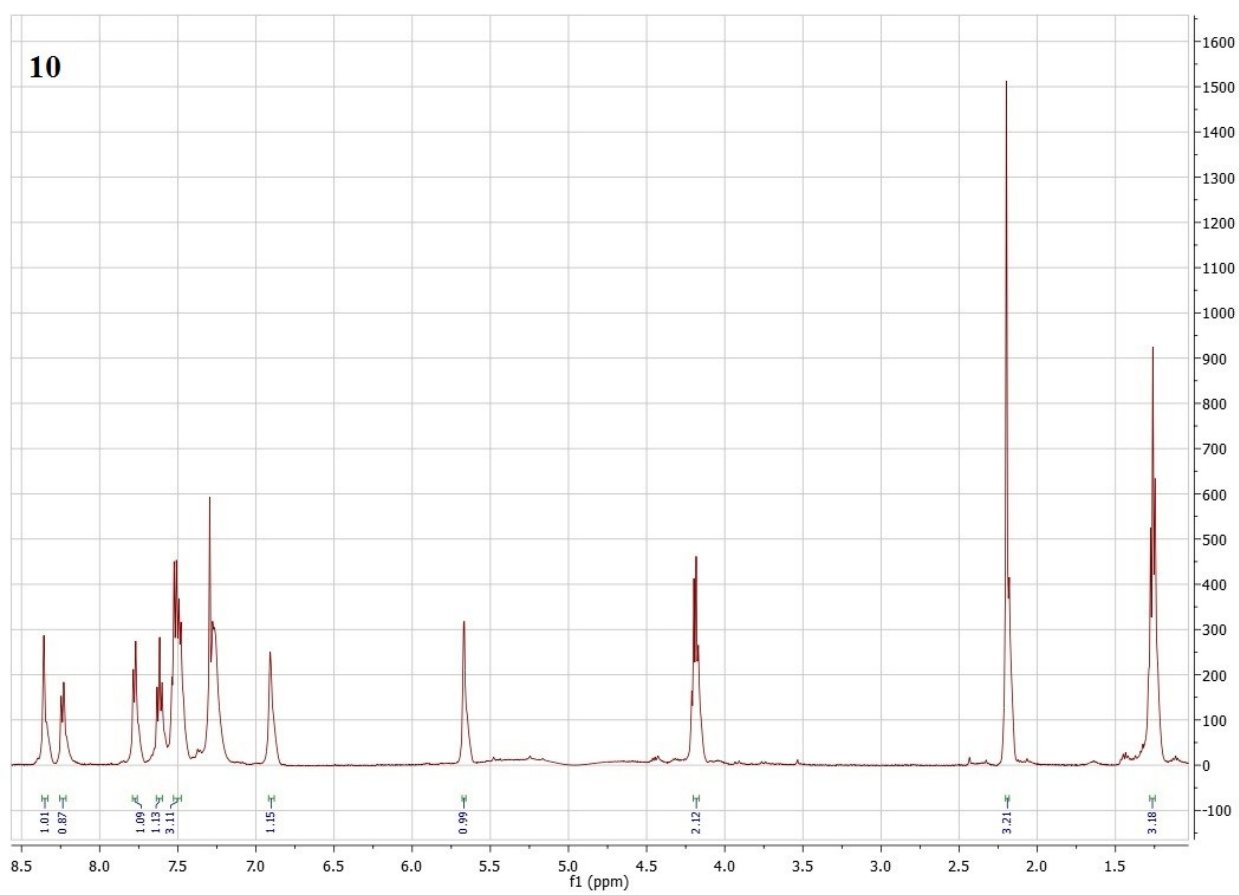

$^1\text{H}$  NMR spectrum of compound **10**

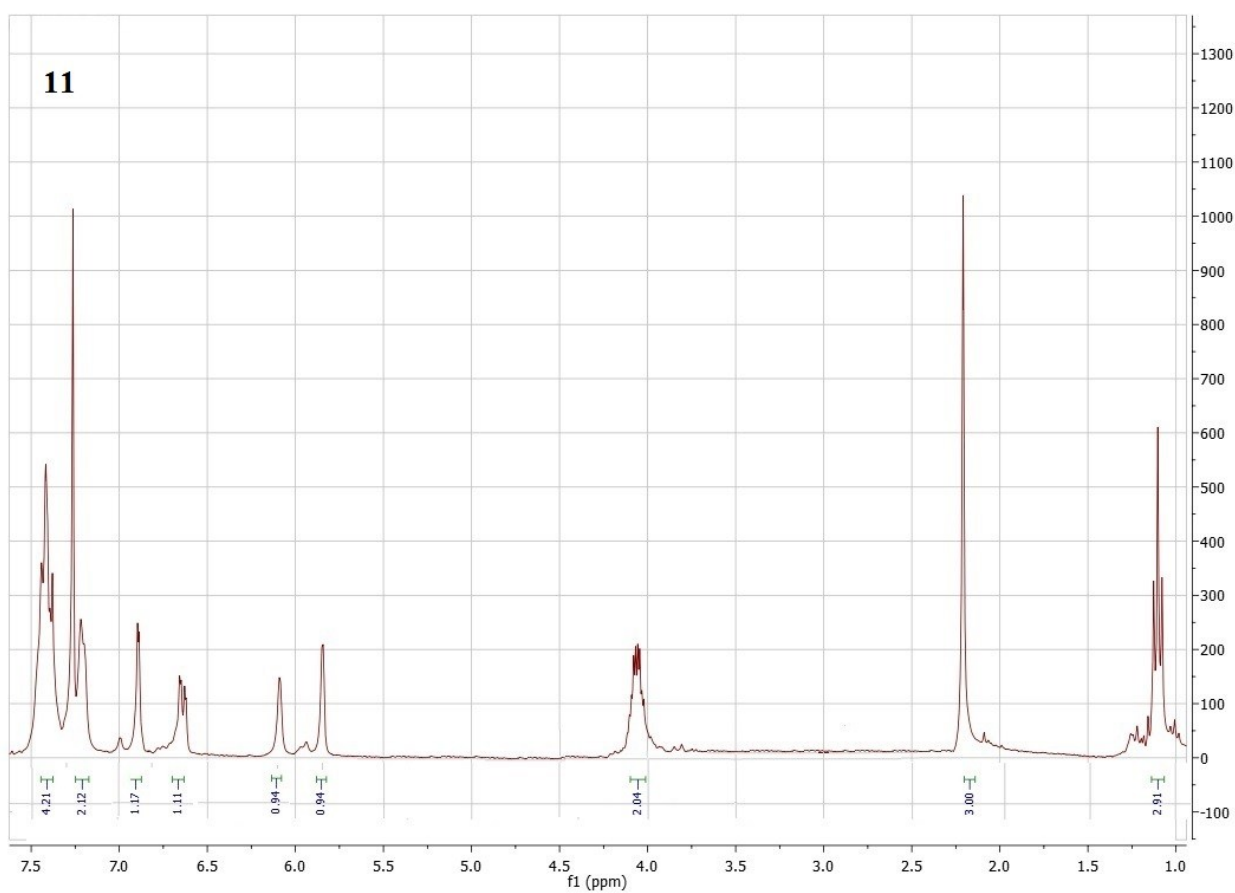

$^1\text{H}$  NMR spectrum of compound **11**

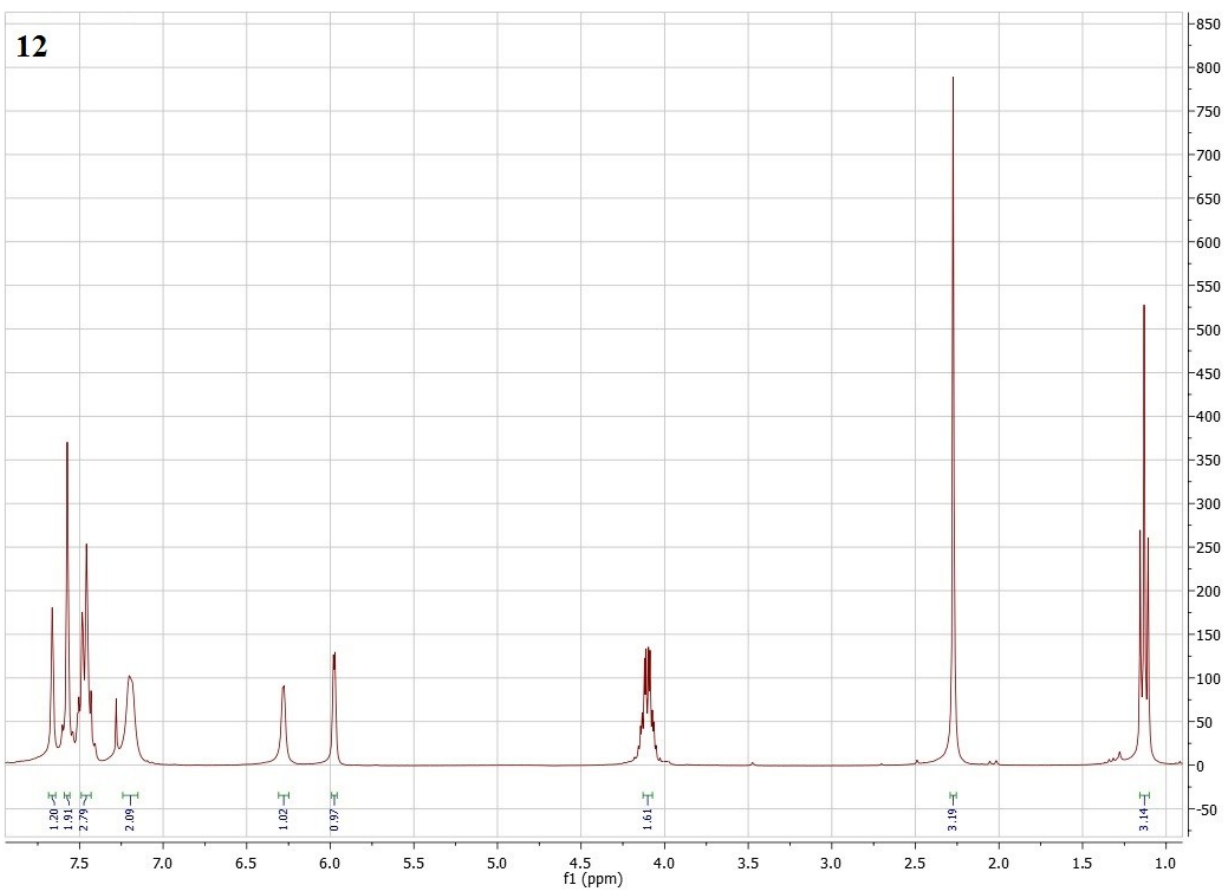

$^1\text{H}$  NMR spectrum of compound **12**

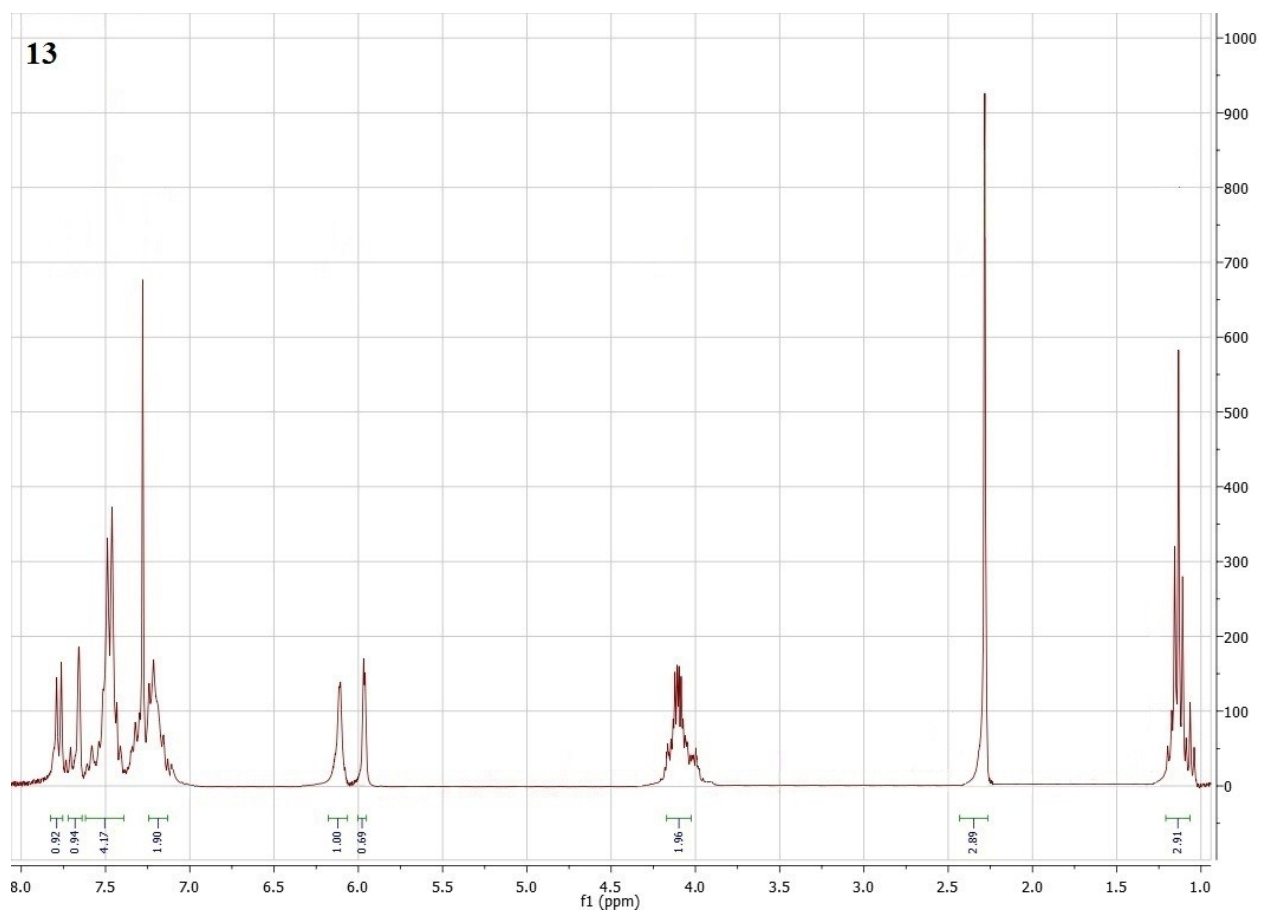

$^1\text{H}$  NMR spectrum of compound **13**

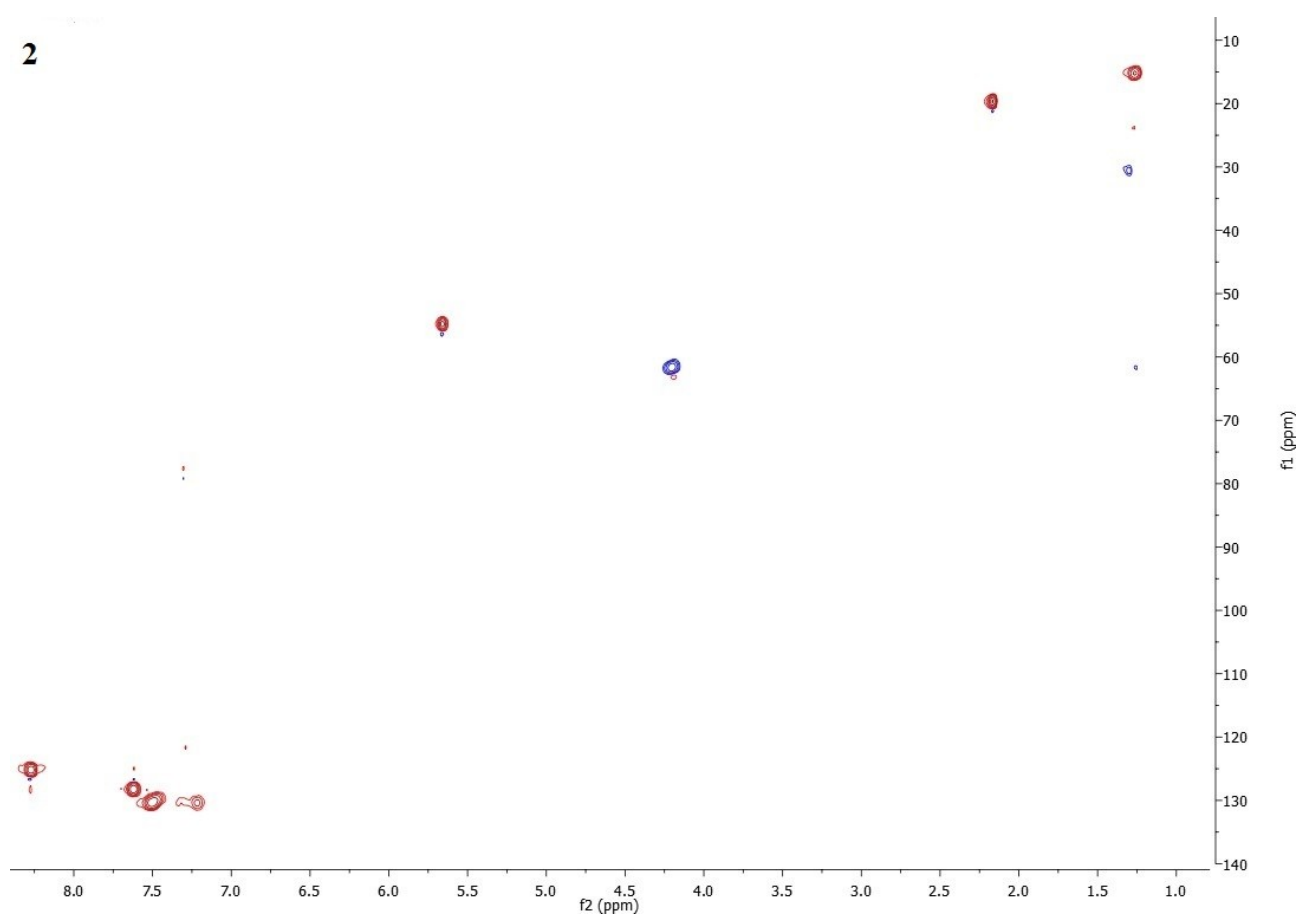

HSQC NMR spectrum of compound 2

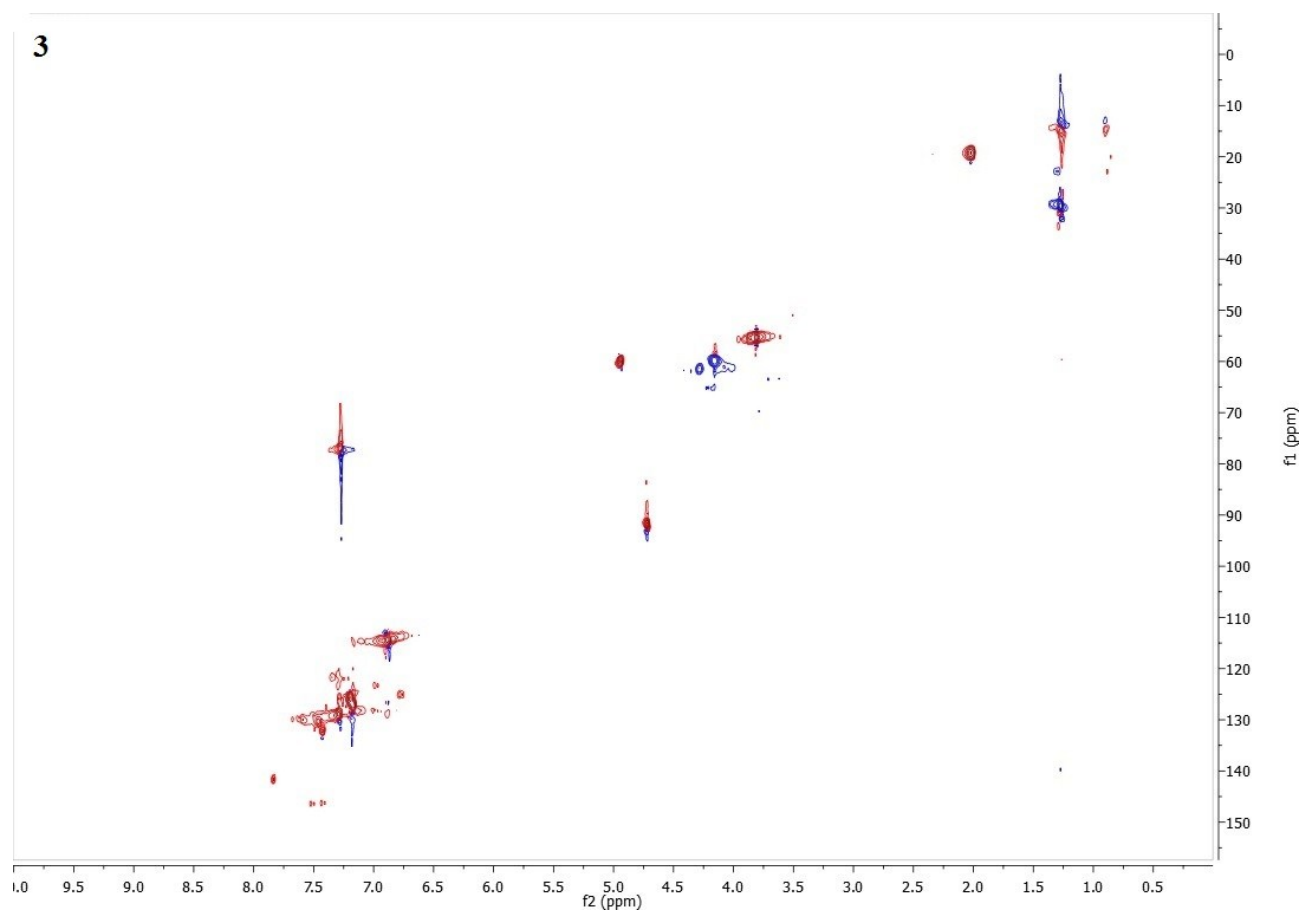

HSQC NMR spectrum of compound **3**

4

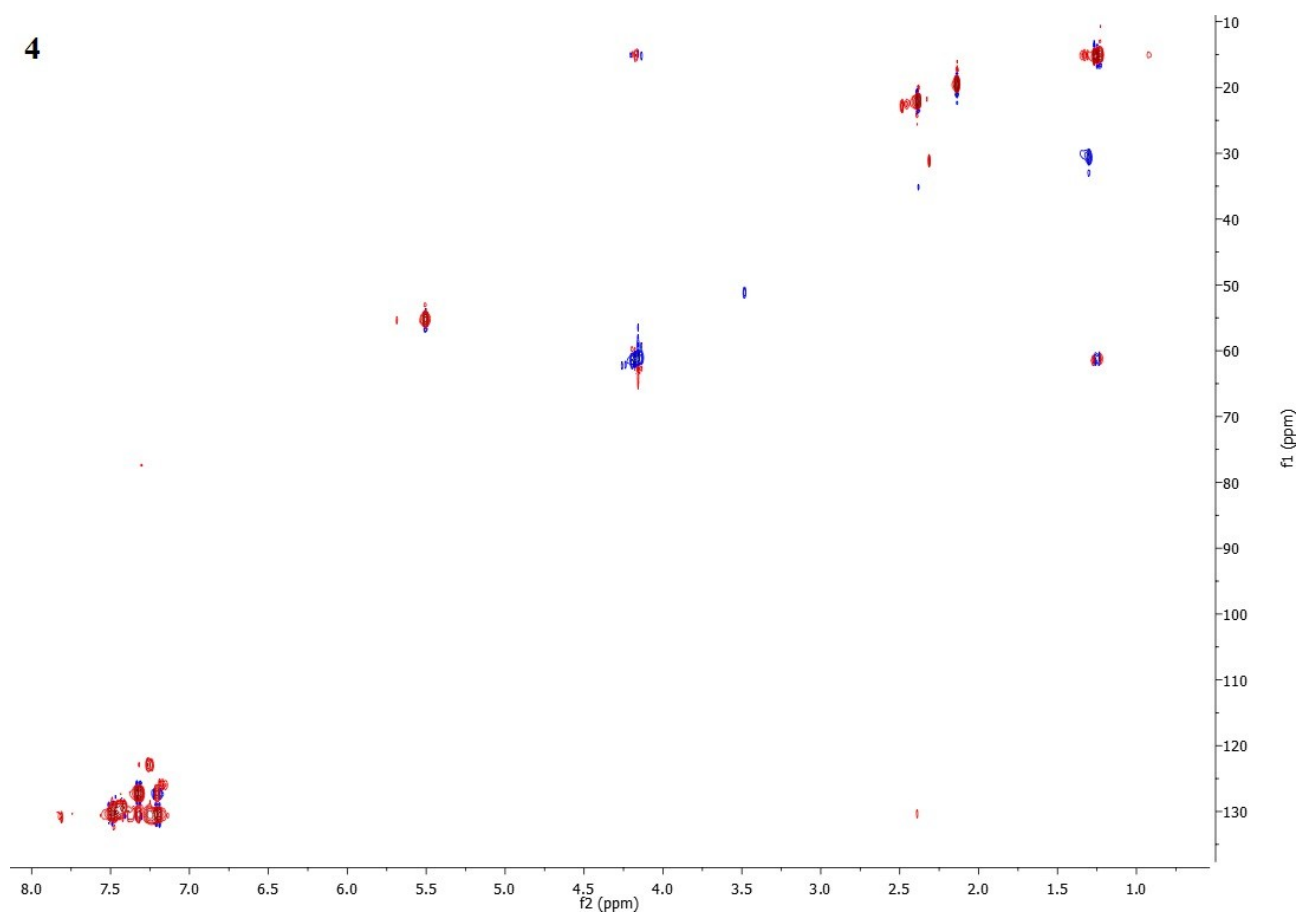

HSQC NMR spectrum of compound 4



**5**

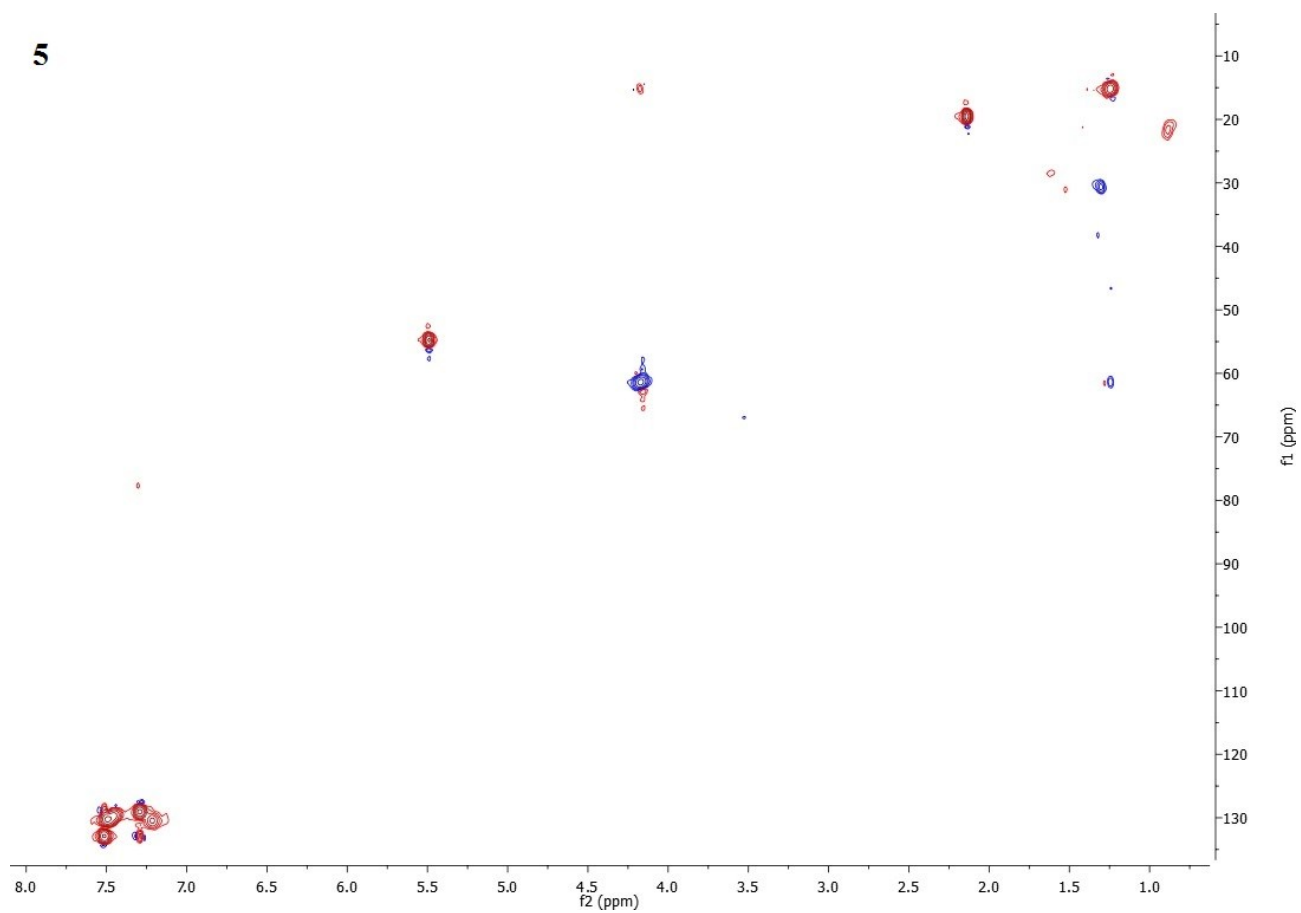

HSQC NMR spectrum of compound **5**

**6**

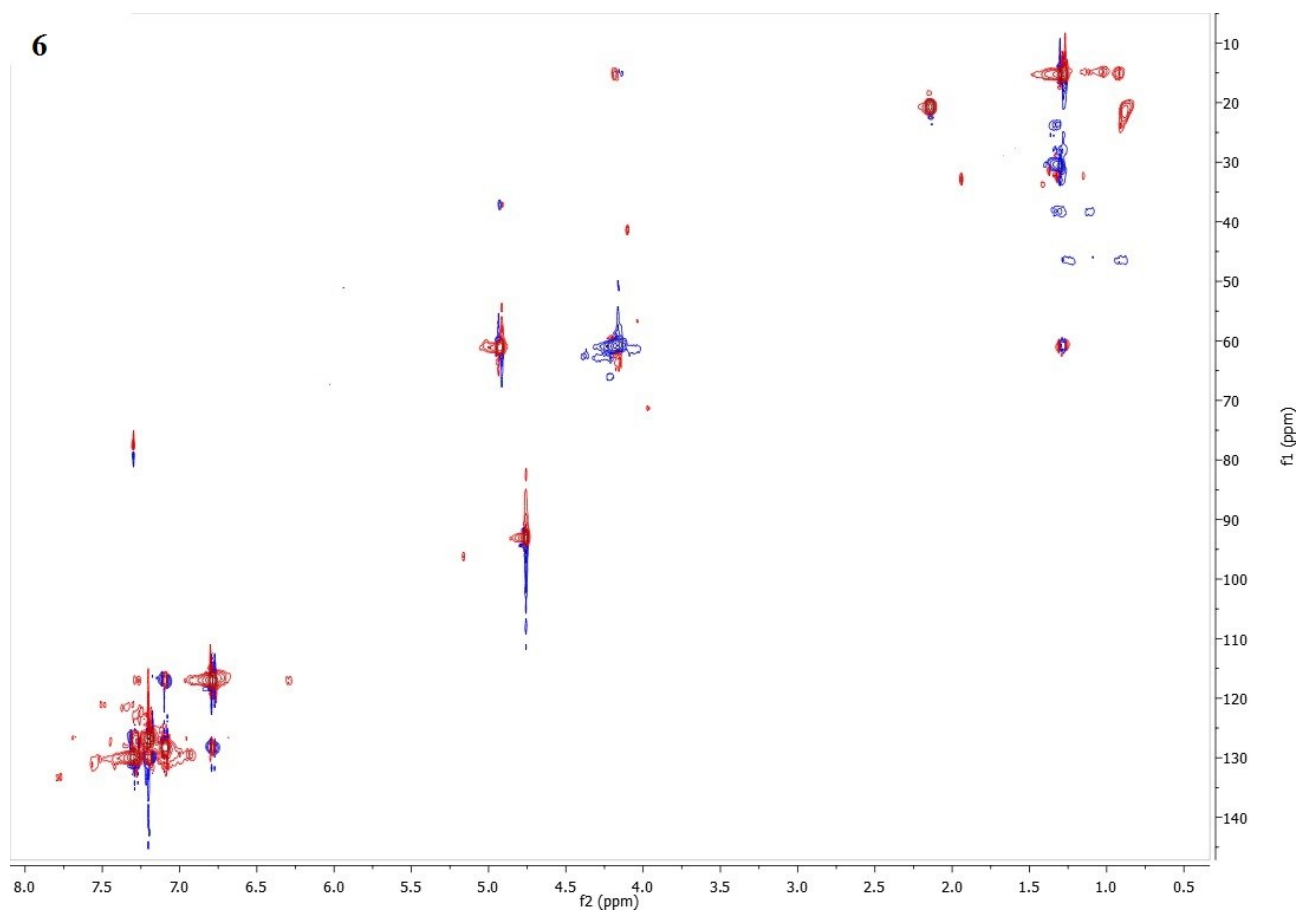

HSQC NMR spectrum of compound **6**

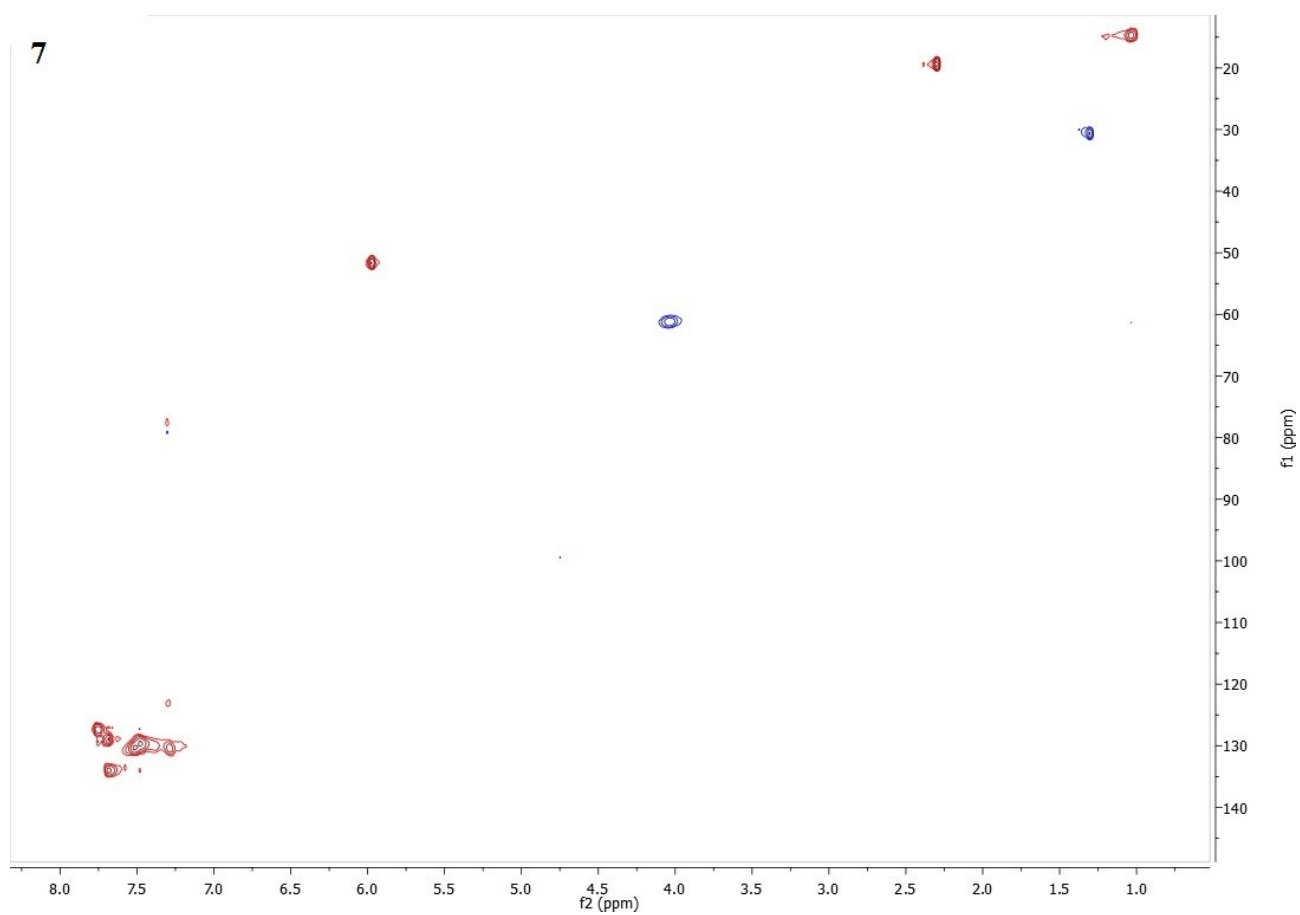

HSQC NMR spectrum of compound 7

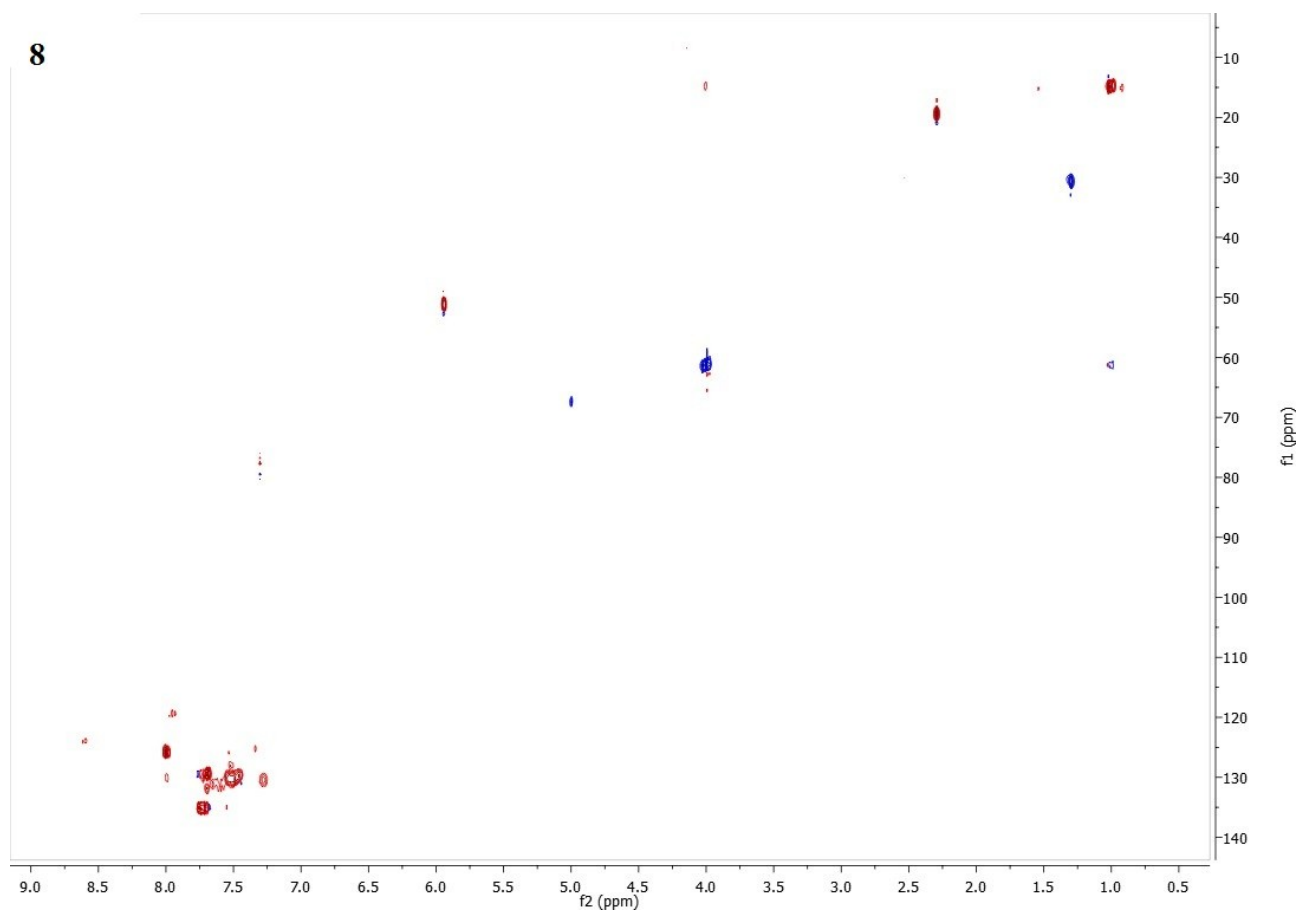

HSQC NMR spectrum of compound **8**

9

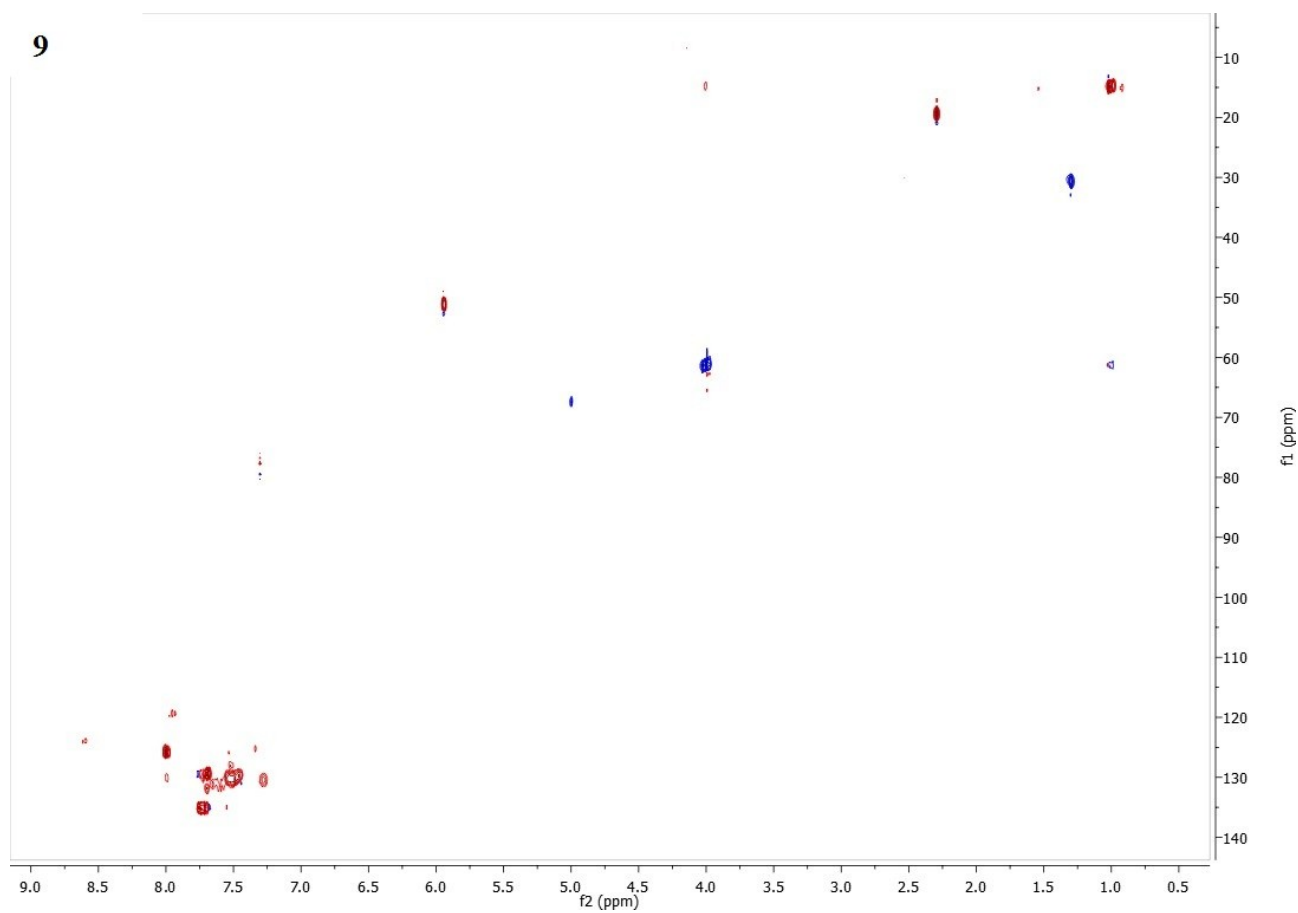

HSQC NMR spectrum of compound **9**

**10**

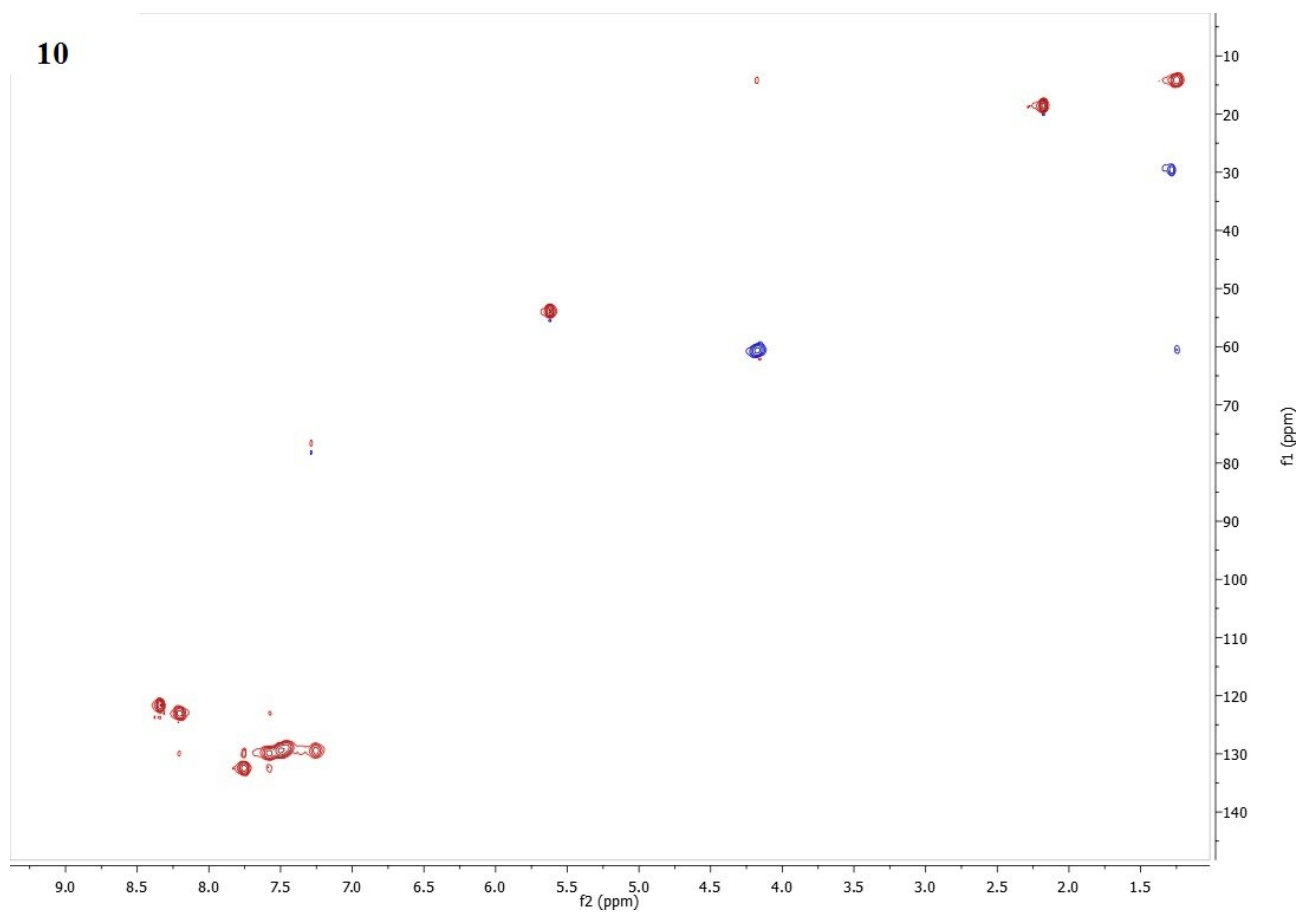

HSQC NMR spectrum of compound **10**

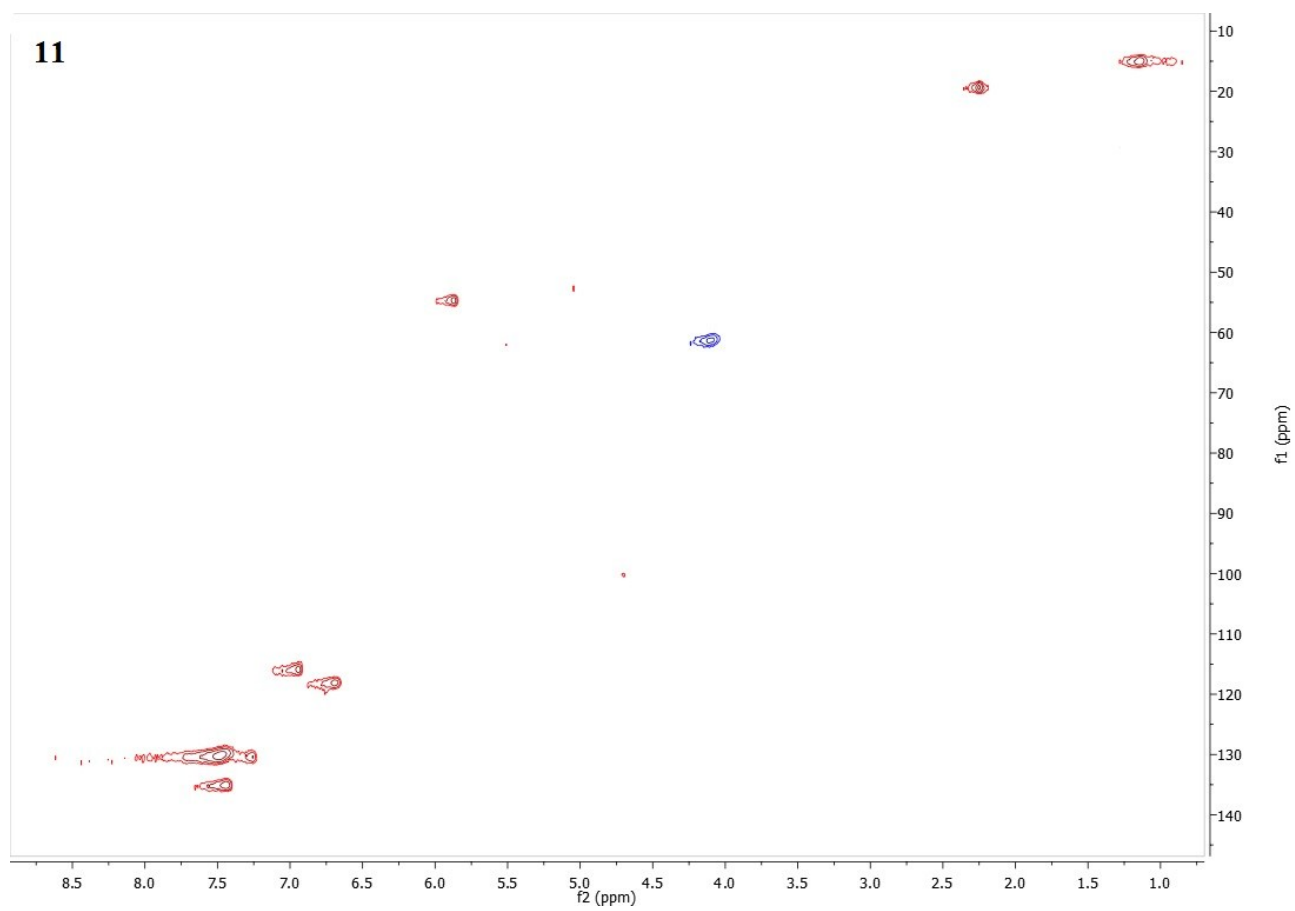

HSQC NMR spectrum of compound **11**

**12**

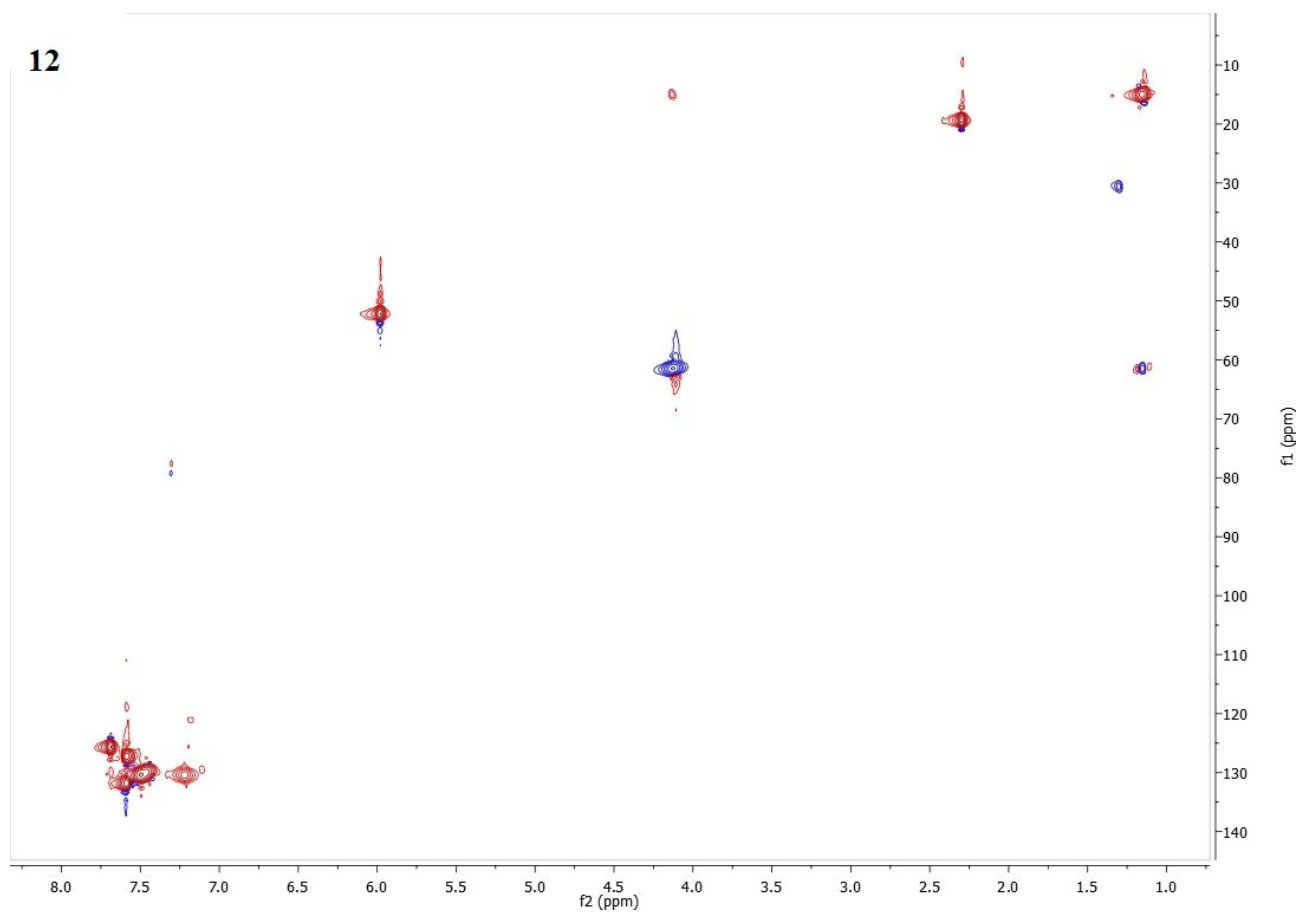

HSQC NMR spectrum of compound **12**



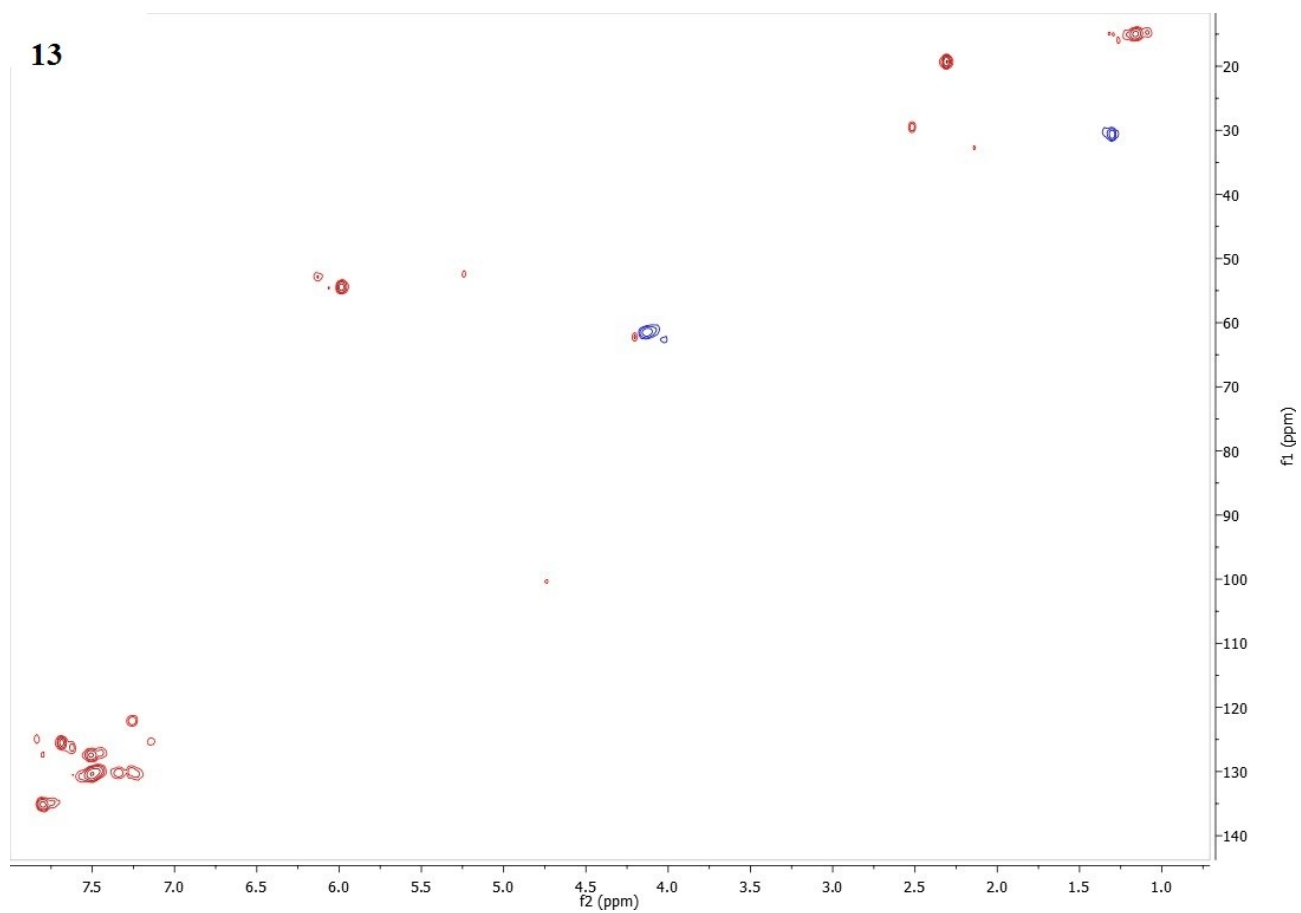

HSQC NMR spectrum of compound **13**

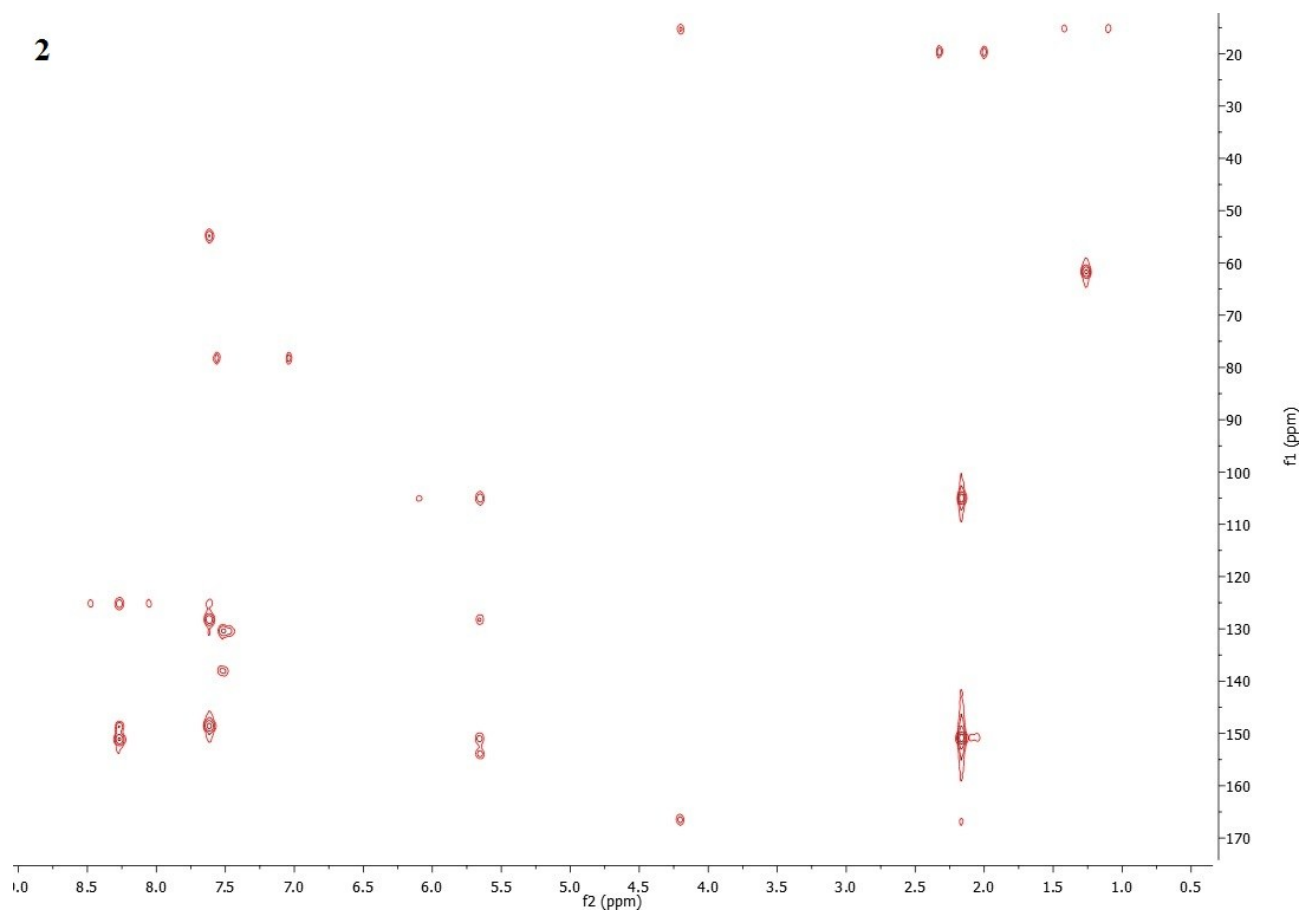

HMBC NMR spectrum of compound **2**

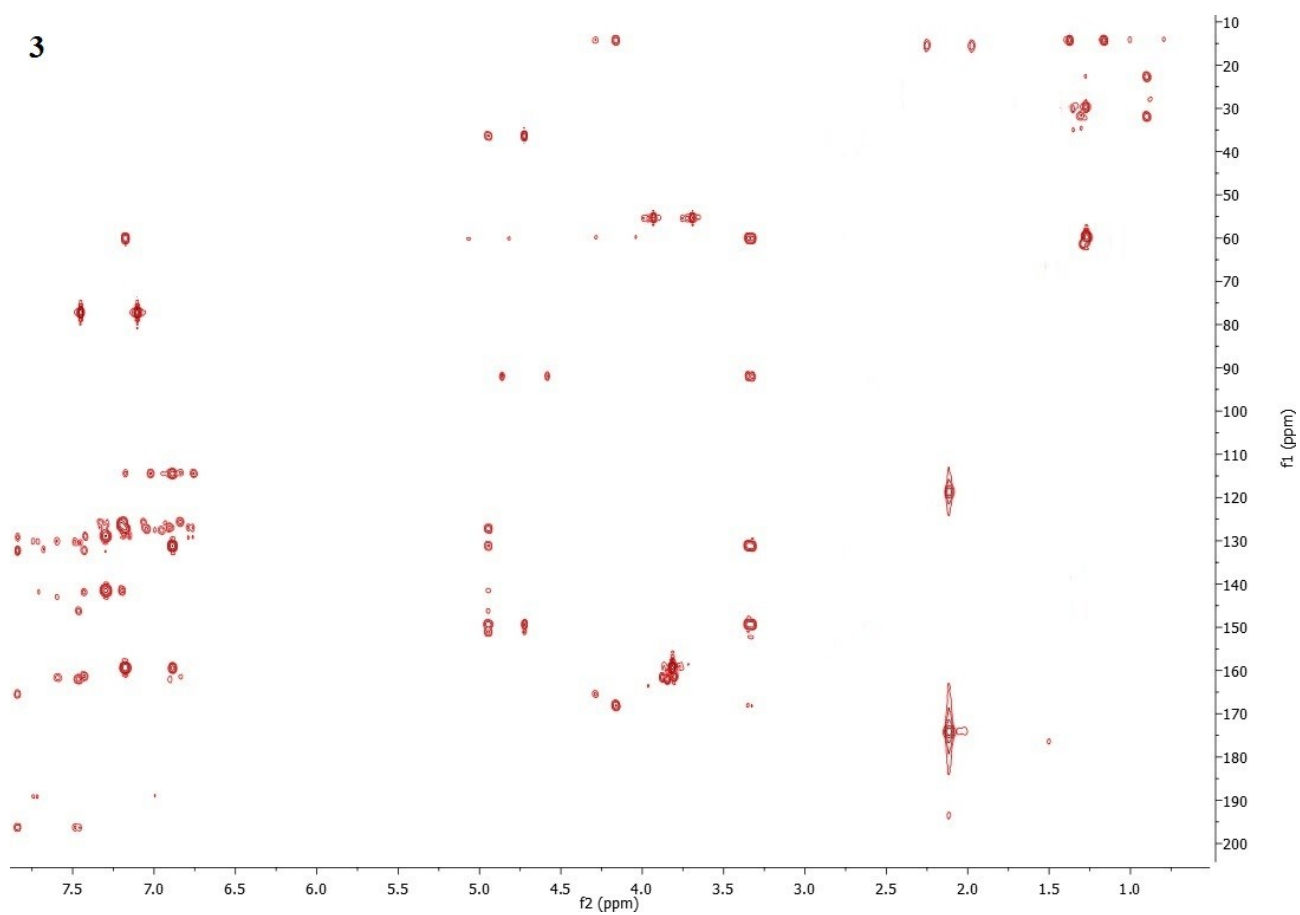

HMBC NMR spectrum of compound **3**

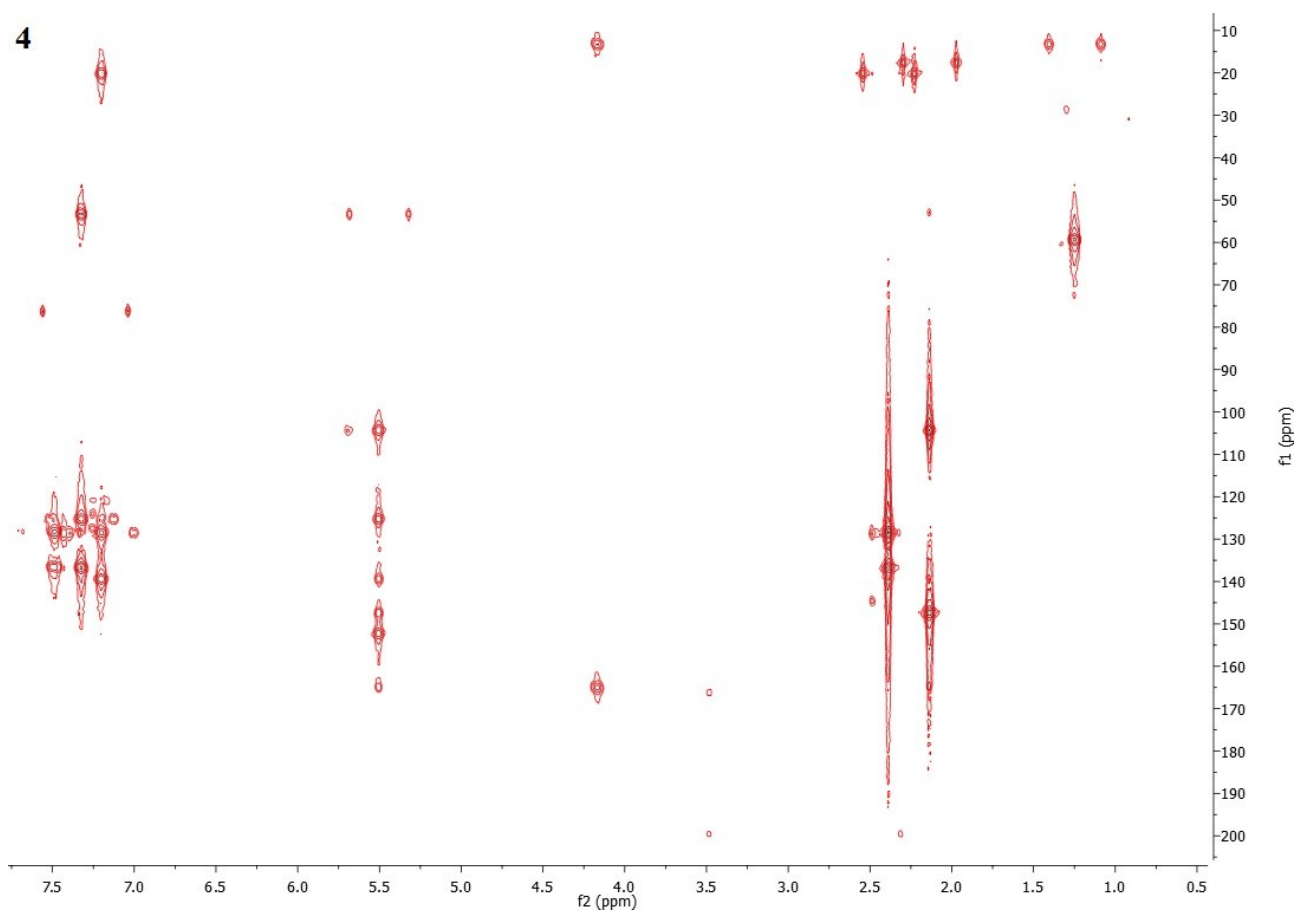

HMBC NMR spectrum of compound **4**

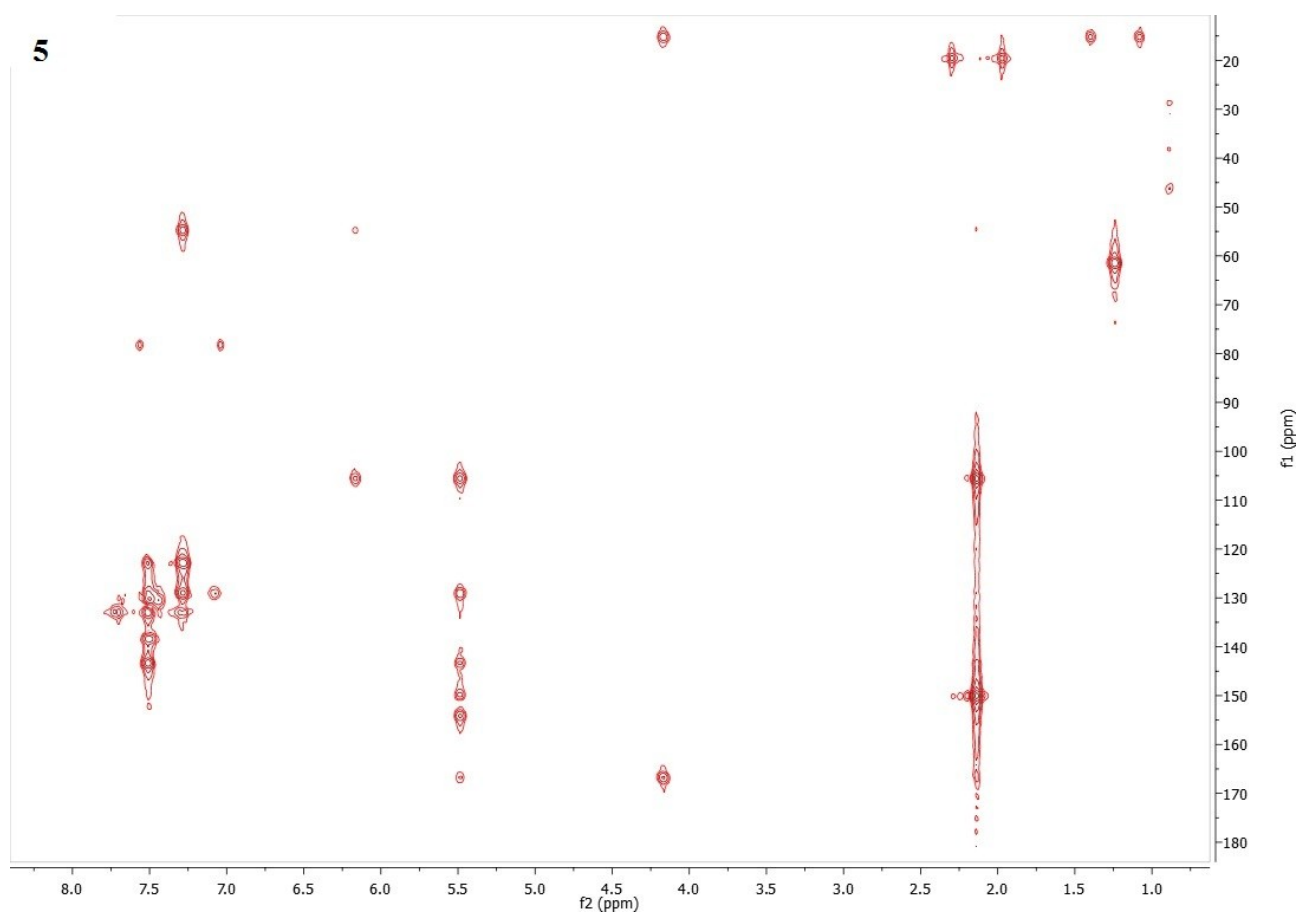

HMBC NMR spectrum of compound **5**

**6**

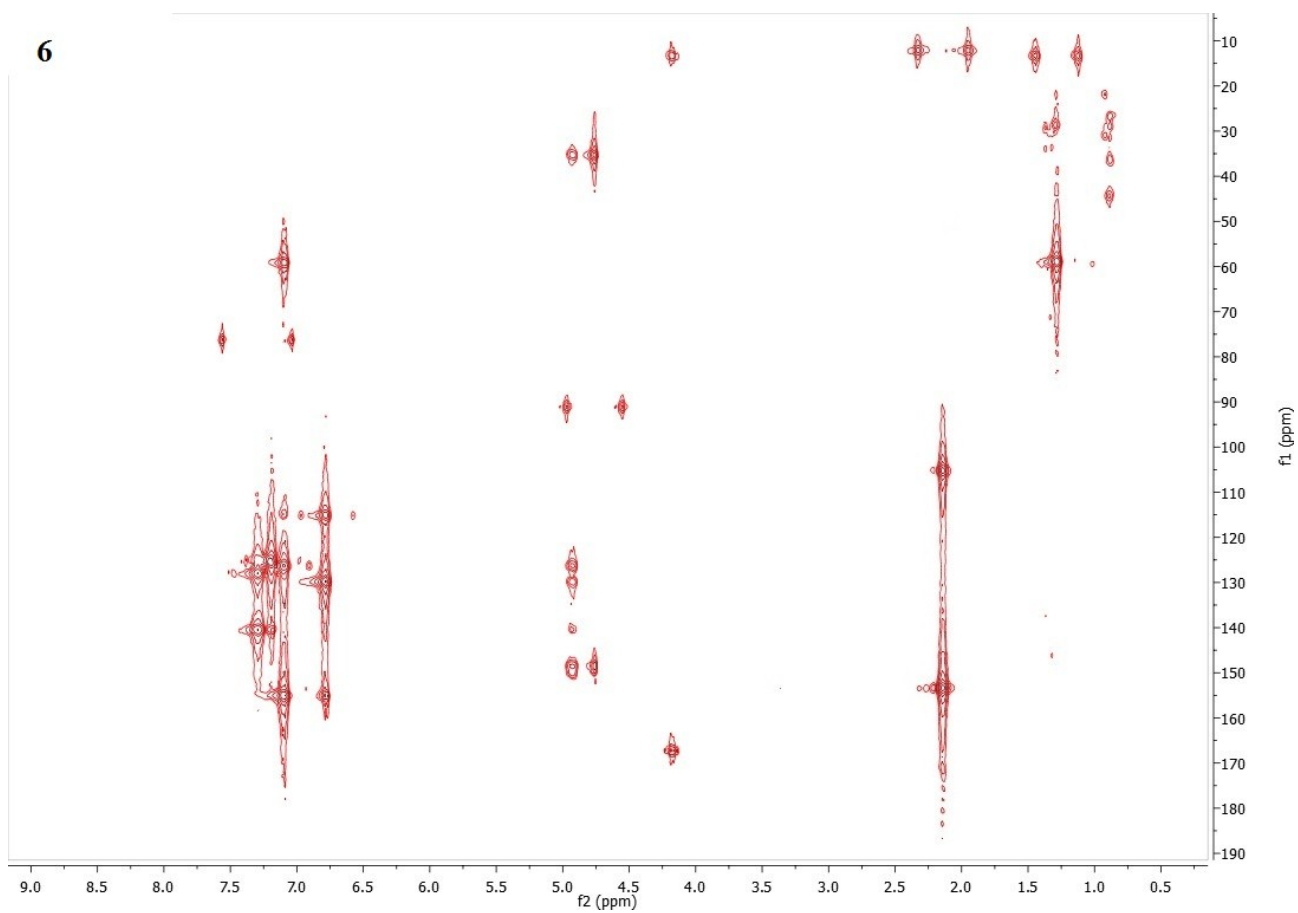

HMBC NMR spectrum of compound **6**

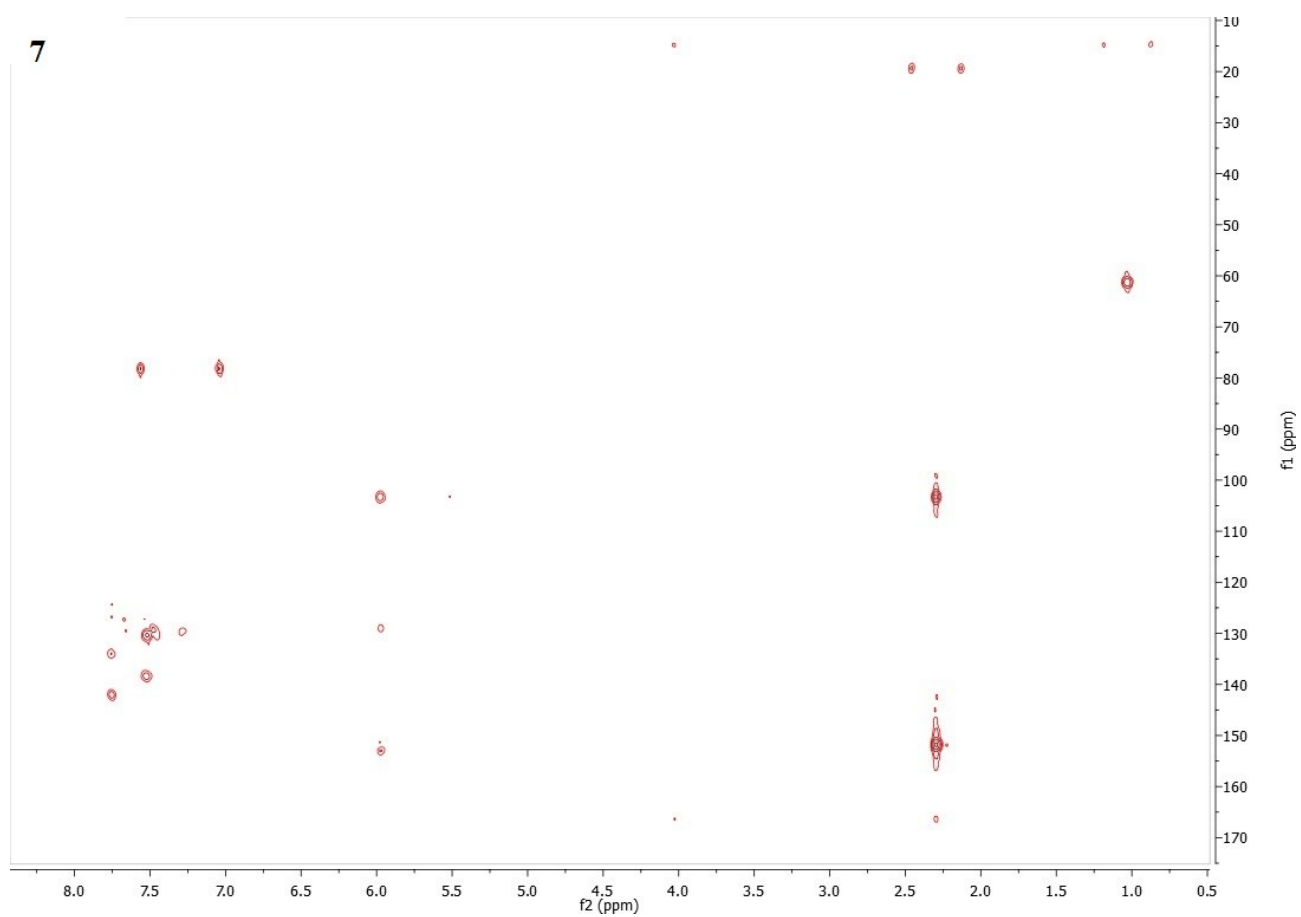

HMBC NMR spectrum of compound **7**

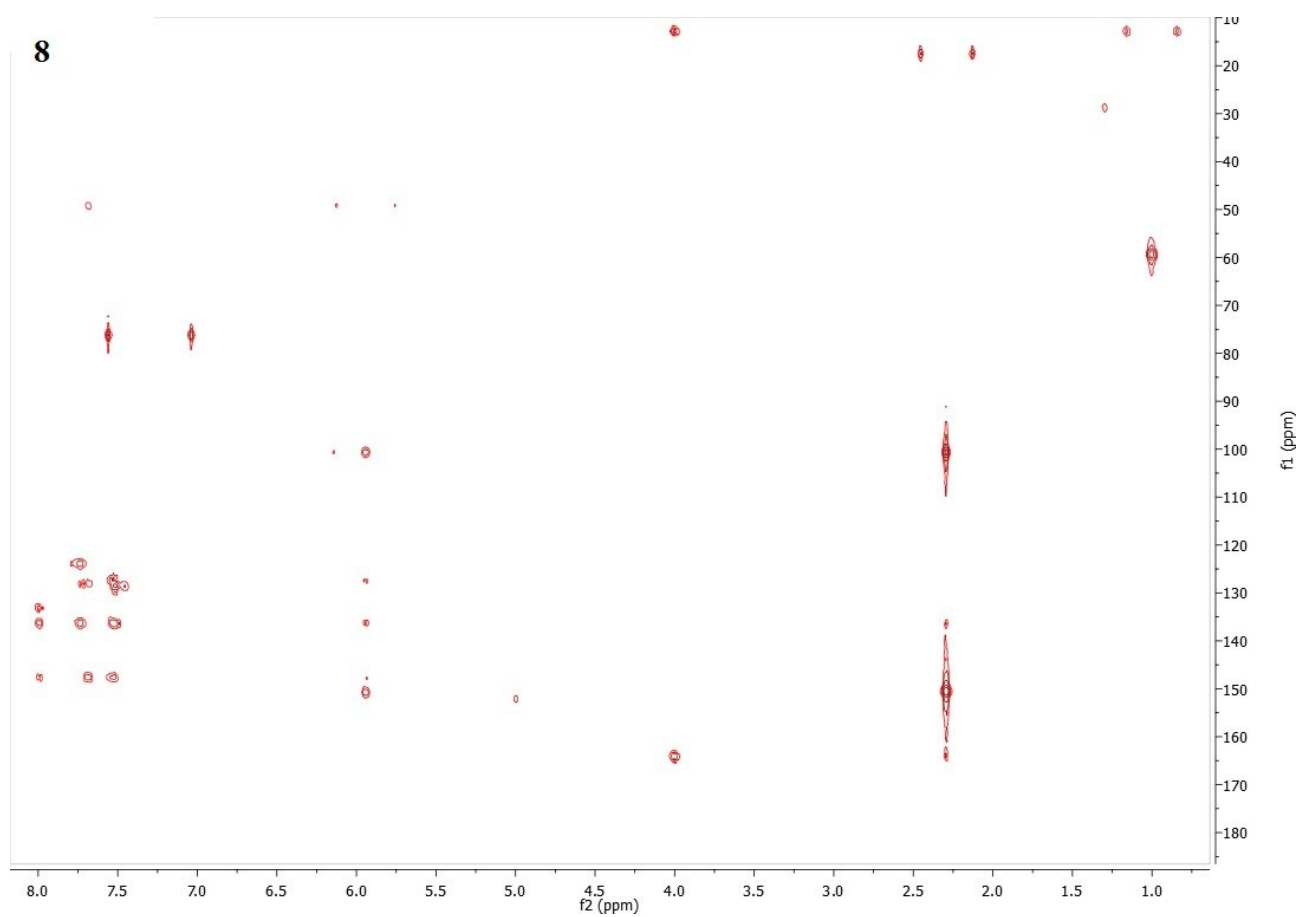

HMBC NMR spectrum of compound **8**



9

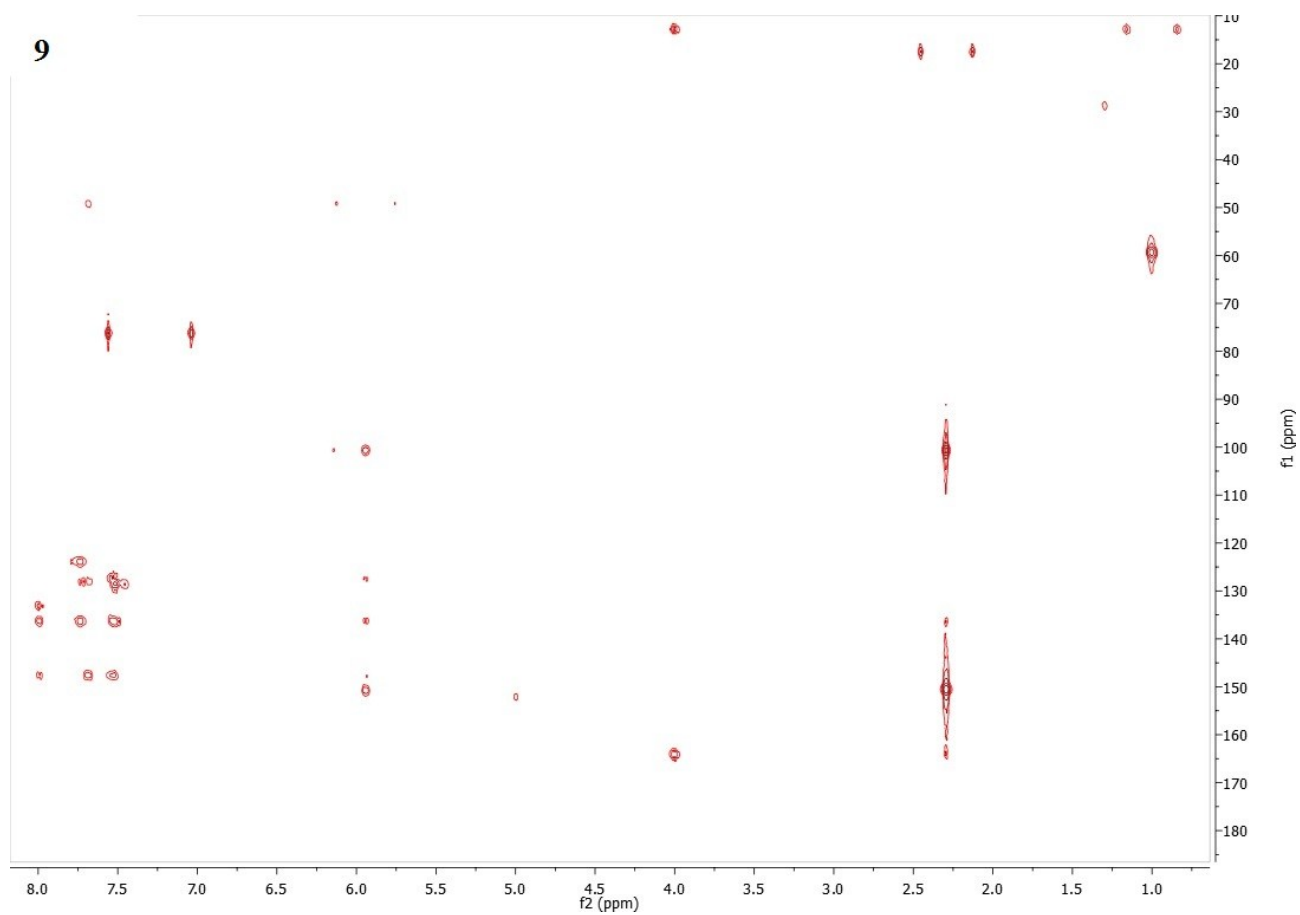

HMBC NMR spectrum of compound 9

**10**

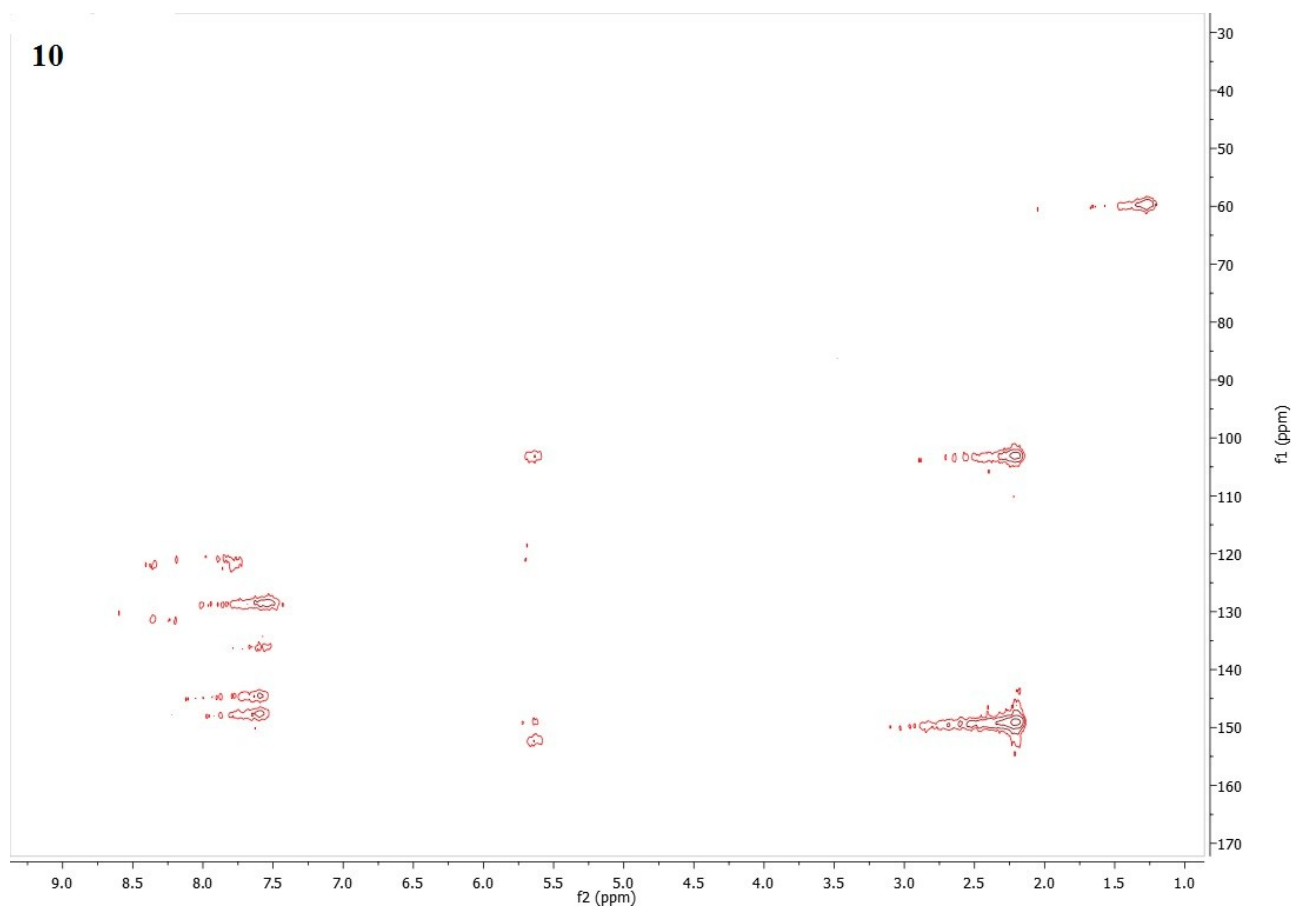

HMBC NMR spectrum of compound **10**

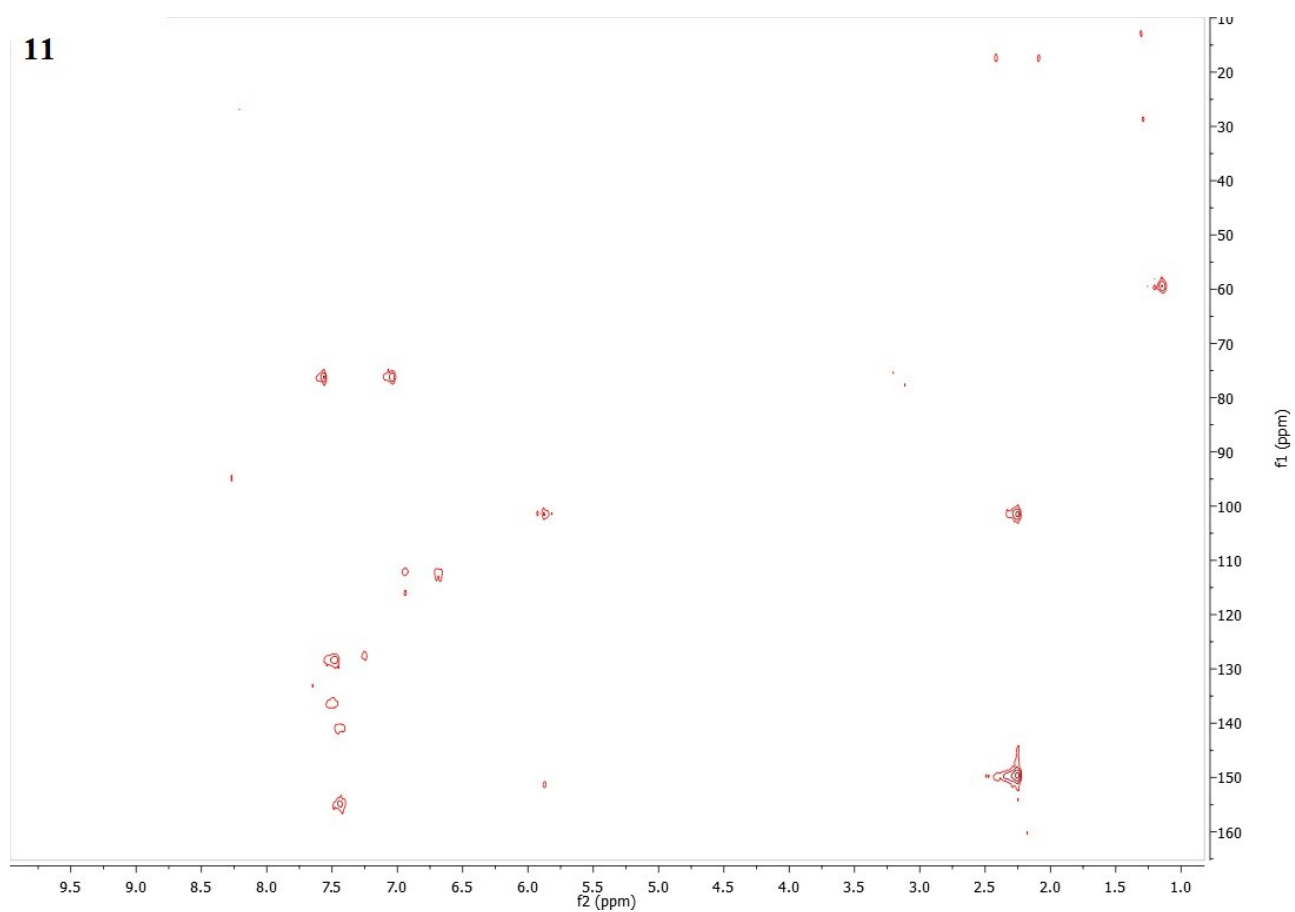

HMBC NMR spectrum of compound **11**

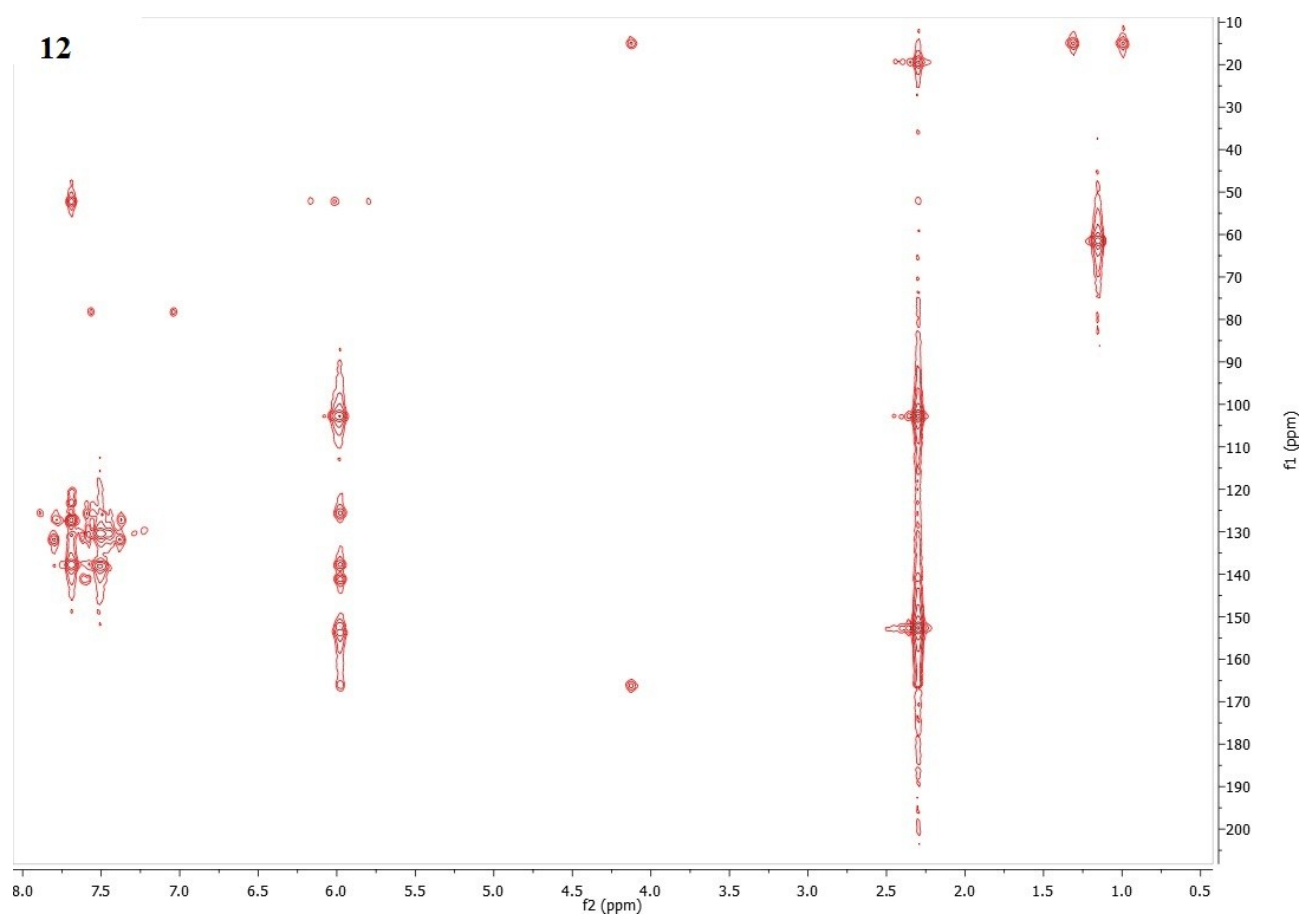

HMBC NMR spectrum of compound **12**

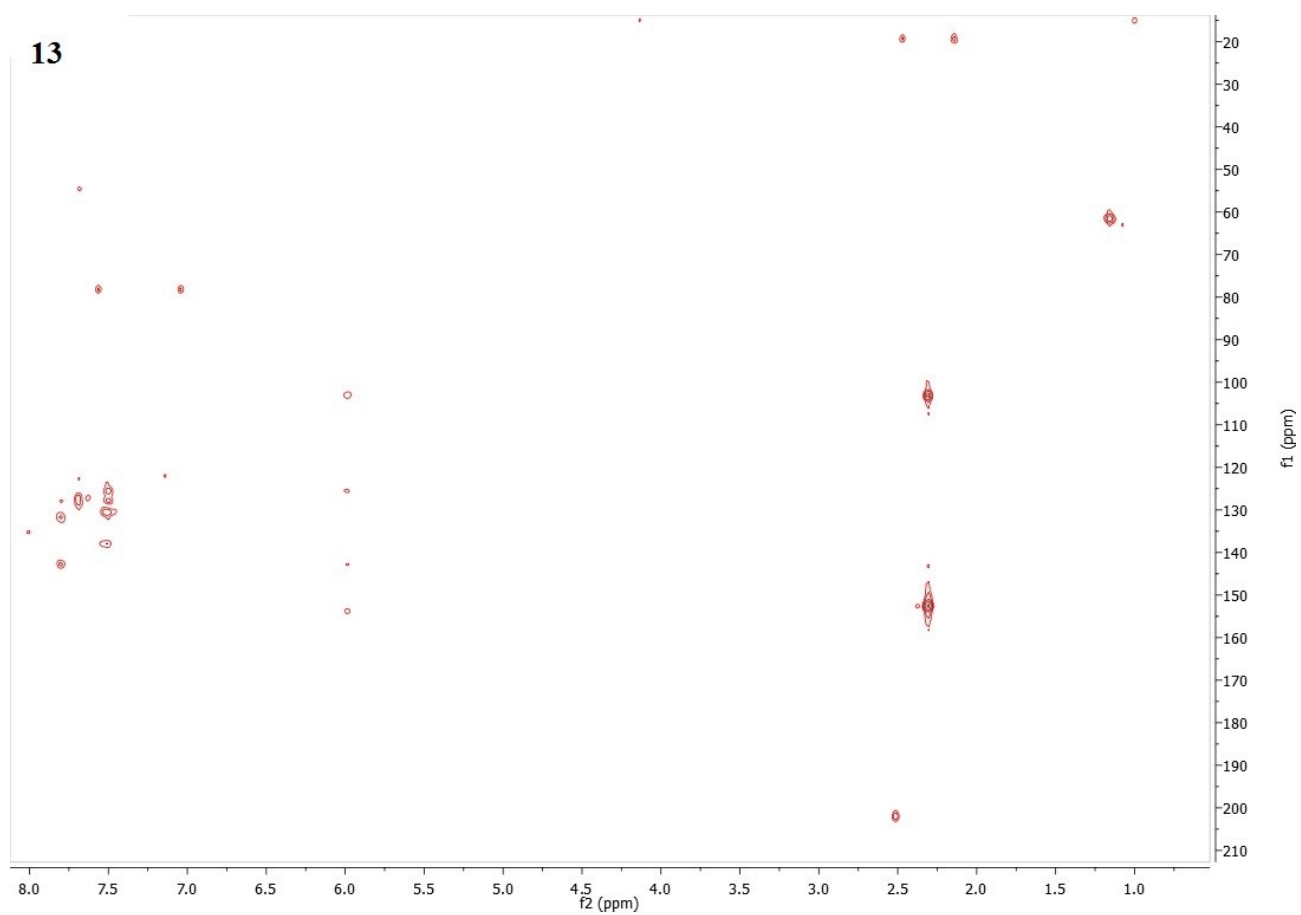

HMBC NMR spectrum of compound **13**
